# Supplementary material for: Gaseous elemental mercury (GEM) fluxes over canopy of two typical subtropical forests in south China
Source: Copernicus journal article supplement (doi:10.5194/acp-18-495-2018), 2018-01-17
Supplement: Supplementary file 1 [file acp-18-495-2018-supplement.zip]

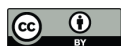

## *Supplement of*

# **Gaseous elemental mercury (GEM) fluxes over canopy of two typical subtropical forests in south China**

**Qian Yu et al.**

*Correspondence to:* Lei Duan ([lduan@tsinghua.edu.cn](mailto:lduan@tsinghua.edu.cn))

- [acp-18-495-2018-supplement-title-page.pdf](#)
- [Data availability-Supplementary.pdf](#)
- [acp-2017-349-supplement.pdf](#)

The copyright of individual parts of the supplement might differ from the CC BY 3.0 License.
