# Supplementary material for: Gaseous elemental mercury (GEM) fluxes over canopy of two typical subtropical forests in south China
Source: Copernicus journal article supplement (doi:10.5194/acp-18-495-2018), 2018-01-17
Supplement: Supplementary file 2 [file acp-18-495-2018-supplement.zip]

9 1 Calculation steps of turbulent transfer coefficient ( $K$ ):..... Page S1

10 References ..... Page S2

11 Table S1..... Page S2

12 Table S2..... Page S3

13 Figure S1. .... Page S4

14 Figure S2. .... Page S6

15 Figure S3. .... Page S7

16 Figure S4. .... Page S8

17 Figure S5. .... Page S9

18 Figure S6. .... Page S10

19

20

21 **1 Calculation steps of turbulent transfer coefficient ( $K$ ):**

22 Turbulent transfer coefficient  $K$  was calculated according to the similarity theory after the measurement of the wind speed and  
 23 temperature profile (Yu and Sun, 2006)

24 (1) Calculation of Richard Sunds ( $R_i$ ):

$$25 \quad R_i = \frac{g \left( \frac{T_2 - T_1}{z_2 - z_1} + \gamma_d \right)}{T_0 \left( \frac{u_2 - u_1}{z_2 - z_1} \right)^2}, \quad (S1)$$

26 where  $g$  is the acceleration of gravity ( $9.8 \text{ m s}^{-2}$ ),  $\gamma_d$  is the dry adiabatic lapse rate ( $0.00976 \text{ K m}^{-1}$ ),  $z_1$  and  $z_2$  are the heights (m),  
 27  $T_1$ ,  $T_2$  and  $T_0$  are the temperatures at two heights and the mean value (K),  $u_1$  and  $u_2$  are wind speeds at two heights ( $\text{m s}^{-1}$ ).

28 (2) Determination of the initial atmospheric stability ( $\zeta_0$ ):

$$29 \quad \zeta_0 = \begin{cases} R_i, & R_i < 0 \\ \frac{R_i}{1 - 5R_i}, & 0 \leq R_i \leq 0.1, \\ 0.2, & R_i > 0.1 \end{cases} \quad (S2)$$

30 (3) Determination of universal dimensionless gradient function( $\Phi(\zeta)$ ):

$$31 \quad \Phi_m(\zeta_0) = \begin{cases} (1 - 15\zeta_0)^{-1/4}, & \zeta_0 \leq 0 \\ 1 + 5\zeta_0, & \zeta_0 > 0 \end{cases}, \quad (S3)$$

$$32 \quad \Phi_h = \Phi_c = \begin{cases} \Phi_m^2, & \zeta_0 \leq 0 \\ \Phi_m, & \zeta_0 > 0 \end{cases}, \quad (S4)$$

33 where  $\Phi_h$ ,  $\Phi_c$  and  $\Phi_m$  are the universal functions of sensible heat, mercury, and momentum.

34 (4) Calculation of scales of speed ( $u_*$ ) and temperature ( $\theta_*$ ):

$$35 \quad u_* = \frac{\kappa(u_2 - u_1)}{\Phi_m(\zeta_0) \ln[(z_2 - d)/(z_1 - d)]}, \quad (S5)$$

$$36 \quad \theta_* = \frac{\kappa(T_2 - T_1)}{\Phi_h(\zeta_0) \ln[(z_2 - d)/(z_1 - d)]}, \quad (S6)$$

37 where  $d$  is the displacement of zero plane (m), equal to 0.7 times of the vegetation height,  $\kappa$  is the Karman constant (0.4).

38 (5) Calculation of Monin-Obukhov length ( $L$ ) and atmospheric stability ( $\zeta$ ):

$$39 \quad L = \frac{u_*^2}{\kappa^2 \frac{g}{\theta_0}}, \quad (S7)$$

$$40 \quad \zeta = z / L, \quad (S8)$$

41 where  $\theta_0 = T_0$ , and  $z$  indicates the height related to the flux (m).

42 (6) If there is a large difference between  $\zeta$  and  $\zeta_0$ , set  $\zeta_0 = \zeta$  and repeat steps (3)-(5) until  $\zeta$  converging to one value.

43 (7) Calculation of turbulent transfer coefficient ( $K$ ) using the parameters

44 
$$K = \frac{u_* K_Z}{\Phi_c(\zeta)}, \tag{S9}$$

45 **References**

46 Yu, G., and Sun, X.: The principle and method of terrestrial ecosystems flux observations. Higher Education Press, Beijing,  
47 2006. (In Chinese)

48

49 **Table S1.** Sensors used for measuring meteorological parameters

| Sensor type                            | Version                                | Detection range            | Accuracy             |
|----------------------------------------|----------------------------------------|----------------------------|----------------------|
| Air temperature (two heights)          | 43347-L (R. M. Young Inc., USA)        | -50 ~50°C                  | ± 0.1°C              |
| Wind speed and direction (two heights) | WindSonic (Gill Inc., UK)              | Wind speed: 0 ~ 60<br>m/s  | ± 2% speed           |
|                                        |                                        | Wind direction: 0–<br>359° | ± 3° direction       |
| Air temperature and humidity           | HMP 155A (Vaisala Inc., Finland)       | Temperature: -80–<br>60°C  | ± 0.2°C              |
|                                        |                                        | Humidity: 0.8–100%         |                      |
| Solar radiation                        | CS300 (Campbell Scientific Inc., USA)  | 300–1120 nm                | ± 5%                 |
| Soil temperature and moisture          | CS 616 (Campbell Scientific Inc., USA) | Temperature: -30–<br>70°C  | Temperature: ± 0.5°C |
|                                        |                                        | Moisture: 0.05–0.5         | Moisture: ± 5%       |
| Precipitation                          | 52202/52203 (R. M. Young Inc., USA)    | ≥ 0.1 mm                   | 2% (≤ 25 mm/h)       |
|                                        |                                        |                            | 3% (≤ 50 mm/h)       |

50

51

52

53 **Table S2.** Seasonal atmospheric GEM flux and meteorological parameters at QYZ and HT sites. Data format: mean value (variance), min  
54 value ~ max value.

|        |     | Atmospheric GEM<br>concentration (ng m <sup>-3</sup> ) | Air<br>temperature<br>(°C) | Air<br>humidity<br>(%) | Soil<br>temperature<br>(°C) | Soil<br>moisture<br>(%) | Solar<br>radiation (W<br>m <sup>-2</sup> ) |
|--------|-----|--------------------------------------------------------|----------------------------|------------------------|-----------------------------|-------------------------|--------------------------------------------|
| Winter | QYZ | 4.05 (1.53)                                            | 7.64 (5.67)                | 72.5 (21.7)            | 8.52 (2.37)                 | 0.30 (0.02)             | 221 (221)                                  |
|        |     | 1.64 ~ 11.7                                            | -4.51 ~ 25.9               | 16.4 ~ 98.7            | 3.90 ~ 15.2                 | 0.27 ~ 0.36             | 0 ~ 846                                    |
|        | HT  | 5.94 (3.20)                                            | 6.42 (5.12)                | 77.9 (20.2)            | 7.33 (2.40)                 | 0.28 (0.01)             | 169 (188)                                  |
|        |     | 1.32 ~ 22.9                                            | -5.15 ~ 24.0               | 15.8 ~ 100             | 1.78 ~ 14.3                 | 0.26 ~ 0.32             | 0 ~ 857                                    |
| Spring | QYZ | 3.47 (1.81)                                            | 19.0 (6.08)                | 82.2 (15.9)            | 18.0 (4.35)                 | 0.37 (0.02)             | 224 (246)                                  |
|        |     | 0.97~17.4                                              | 4.60 ~ 33.6                | 31.3 ~ 98.4            | 8.00 ~ 26.2                 | 0.31 ~ 0.47             | 0 ~ 987                                    |
|        | HT  | 5.50 (2.91)                                            | 16.7 (5.56)                | 86.4 (14.2)            | 16.1 (3.99)                 | 0.28 (0.02)             | 201 (232)                                  |
|        |     | 1.45 ~ 22.9                                            | 4.93 ~ 32.1                | 25.4 ~ 99.5            | 7.42 ~ 25.1                 | 0.24 ~ 0.34             | 0 ~ 971                                    |
| Summer | QYZ | 3.30 (1.23)                                            | 27.3 (3.77)                | 80.0 (15.8)            | 26.1 (1.52)                 | 0.37 (0.04)             | 325 (291)                                  |
|        |     | 1.60 ~ 8.83                                            | 20.1 ~ 36.8                | 35.9 ~ 98.3            | 22.8 ~ 29.5                 | 0.28 ~ 0.52             | 0 ~1000                                    |
|        | HT  | 5.51 (3.09)                                            | 25.2 (3.73)                | 87.4 (14.0)            | 26.6 (1.93)                 | 0.25 (0.02)             | 207 (261)                                  |
|        |     | 1.43 ~ 21.4                                            | 18.0 ~ 36.0                | 41.4 ~ 99.7            | 22.4 ~ 30.1                 | 0.21 ~ 0.31             | 0 ~ 988                                    |
| Fall   | QYZ | 3.75 (1.18)                                            | 20.7 (6.16)                | 80.3 (17.0)            | 20.5 (3.93)                 | 0.26 (0.03)             | 252 (235)                                  |
|        |     | 1.42 ~ 8.76                                            | 5.66 ~ 36.3                | 32.4 ~ 100             | 12.1 ~ 28.3                 | 0.22 ~ 0.35             | 0 ~ 943                                    |
|        | HT  | 6.64 (3.26)                                            | 19.3 (6.04)                | 83.9 (16.3)            | 20.5 (4.83)                 | 0.26 (0.02)             | 217 (245)                                  |
|        |     | 1.56 ~ 22.9                                            | 1.45 ~ 34.4                | 34.6 ~ 100             | 8.61 ~ 28.5                 | 0.23 ~ 0.31             | 0 ~ 965                                    |

55

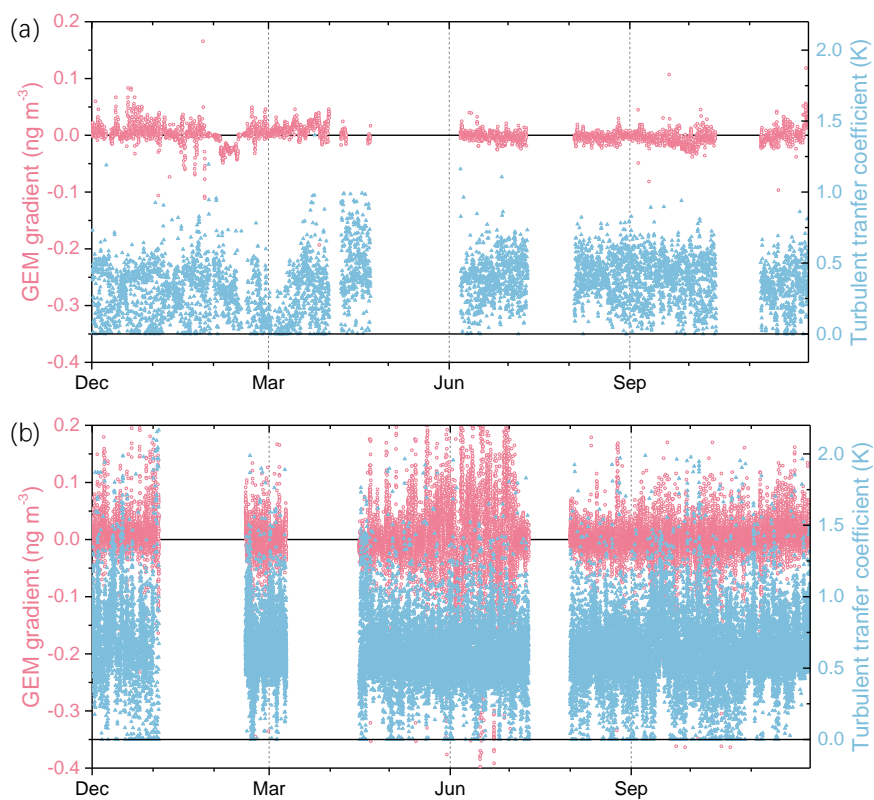

56  
57 **Figure S1.** Annual variations of GEM gradient and turbulent transfer coefficient (K) at QYZ (a) and HT (b) stations. The observations  
58 lasted for one year at both sites (January to December in 2014).  
59

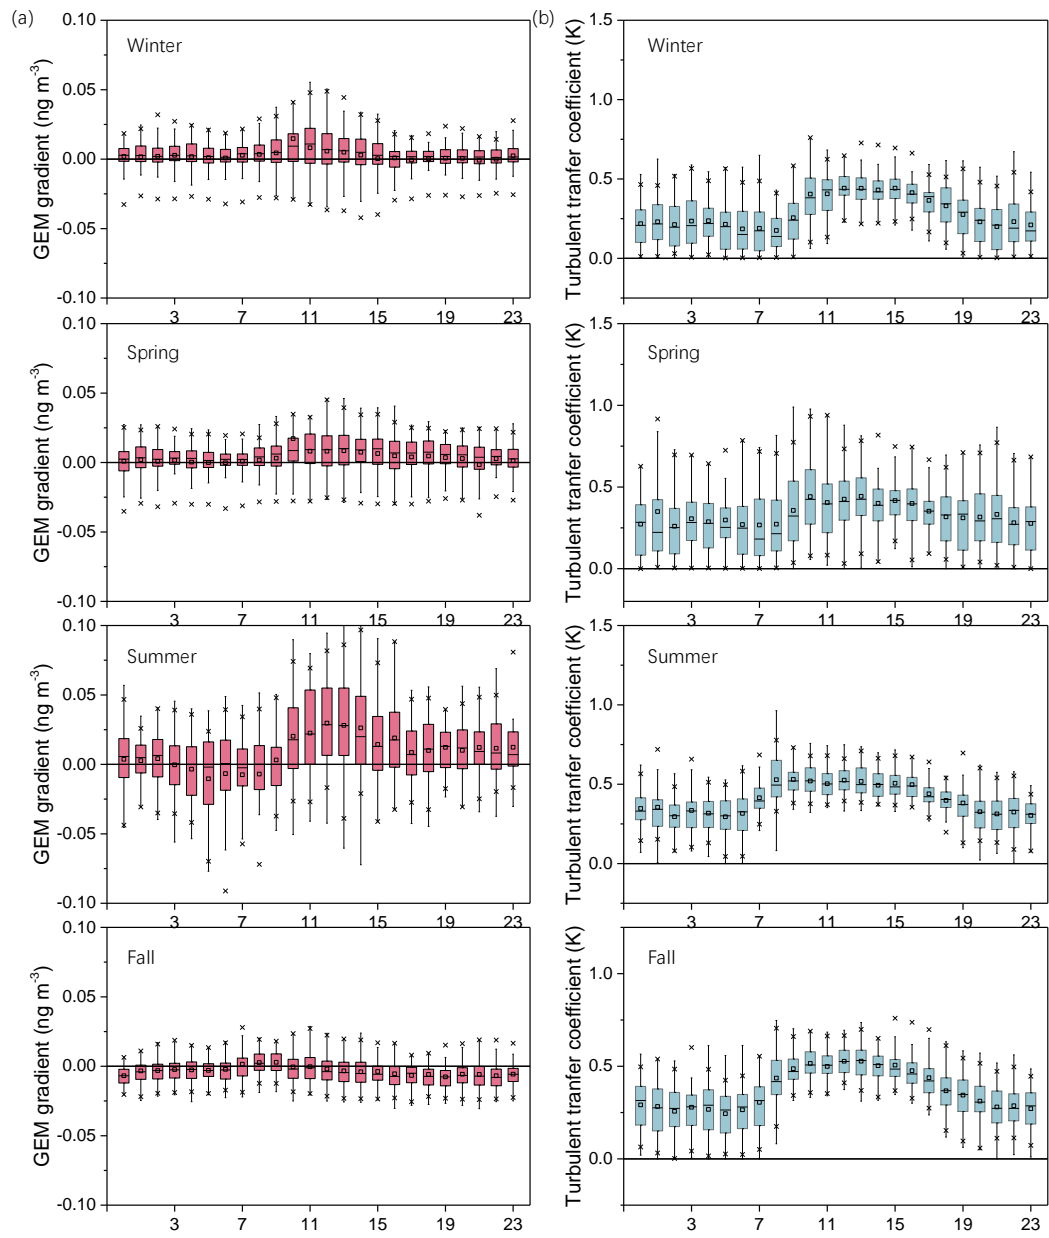

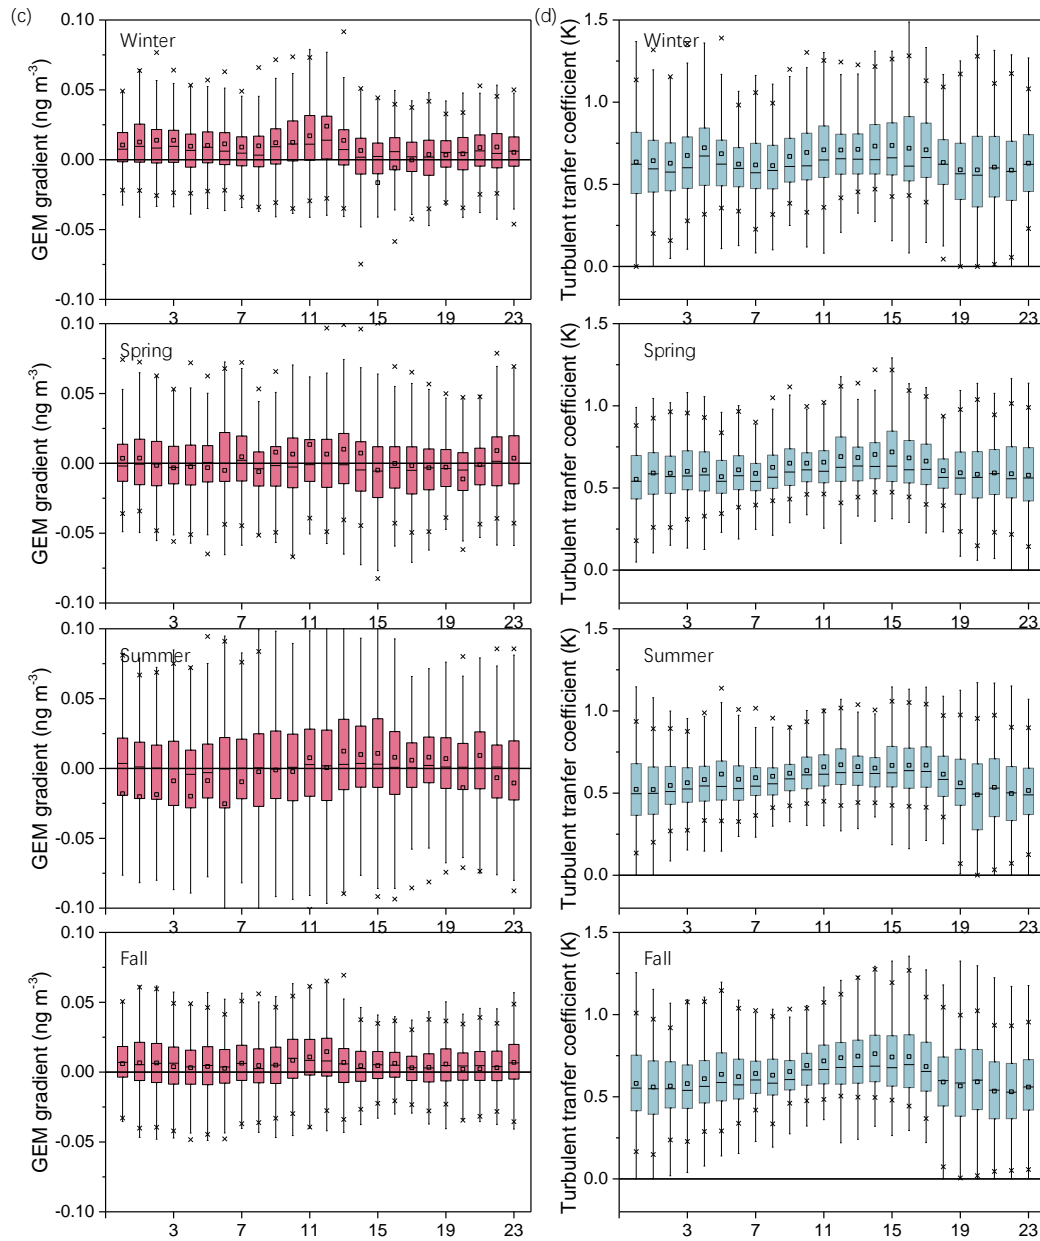

61

62 **Figure S2.** Diurnal variations of GEM gradient and turbulent transfer coefficient (K) in each season. (a) GEM gradient at QYZ; (b) K at  
63 QYZ; (c) GEM gradient at HT; (d) K at HT. Box horizontal border lines represent the 25<sup>th</sup>, 50<sup>th</sup> and 75<sup>th</sup> percentiles from bottom to top, the  
64 whiskers represent outliers, and the 5<sup>th</sup> and 95<sup>th</sup> percentiles are marked as cross. The open square in the box represents the mean value.

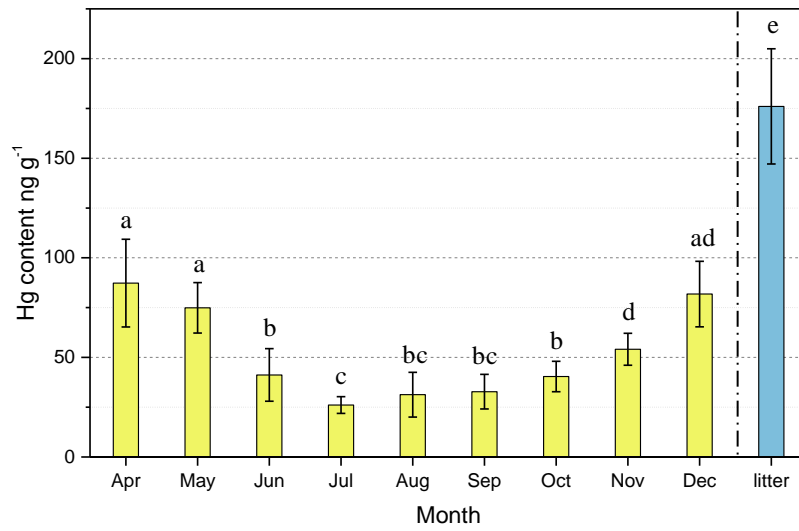

65

66 **Figure S3.** The monthly variation of Hg content of current-year foliage of *Cunninghamia lanceolata* and the Hg content of litter at HT site.

67 Different letters in a column mean significant difference ( $n = 18$ ,  $p < 0.05$ ).

68



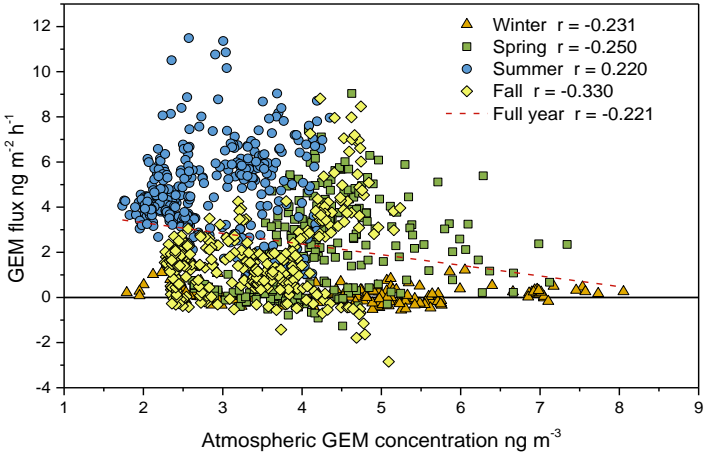

70

71 **Figure S4.** The correlation of GEM flux and atmospheric GEM concentration of soil at QYZ site (unpublished data).

72

73  
74

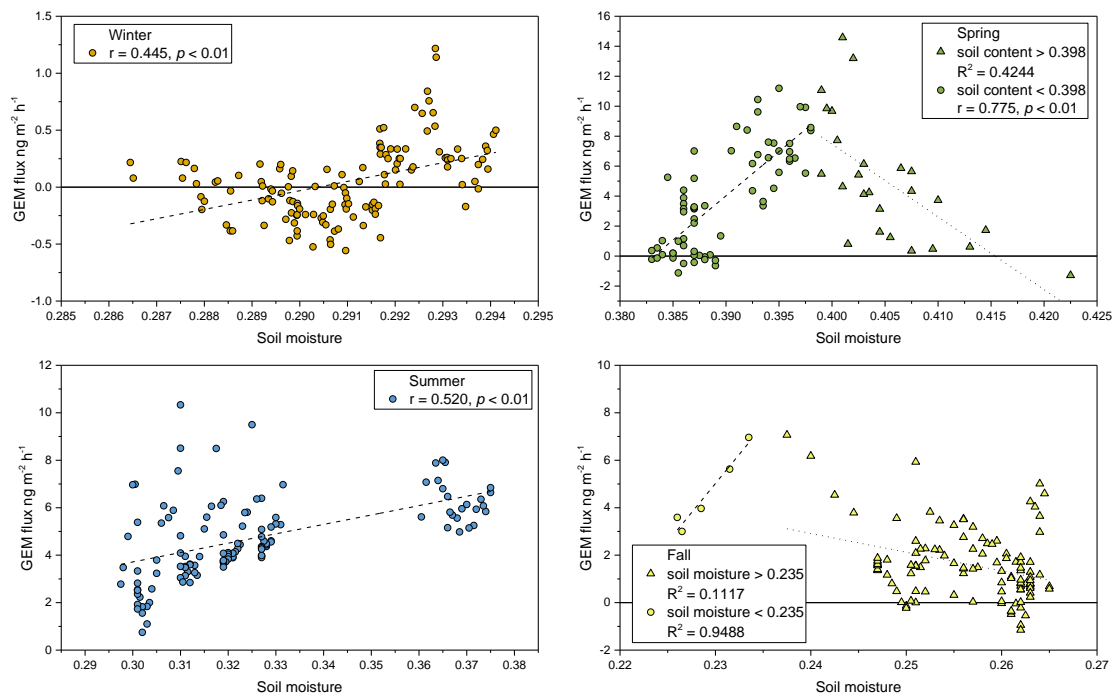

75

76 **Figure S5.** The soil GEM flux varied with the change of soil moisture in winter (a), spring (b), summer (c) and fall (d) at QYZ site  
77 (unpublished data).

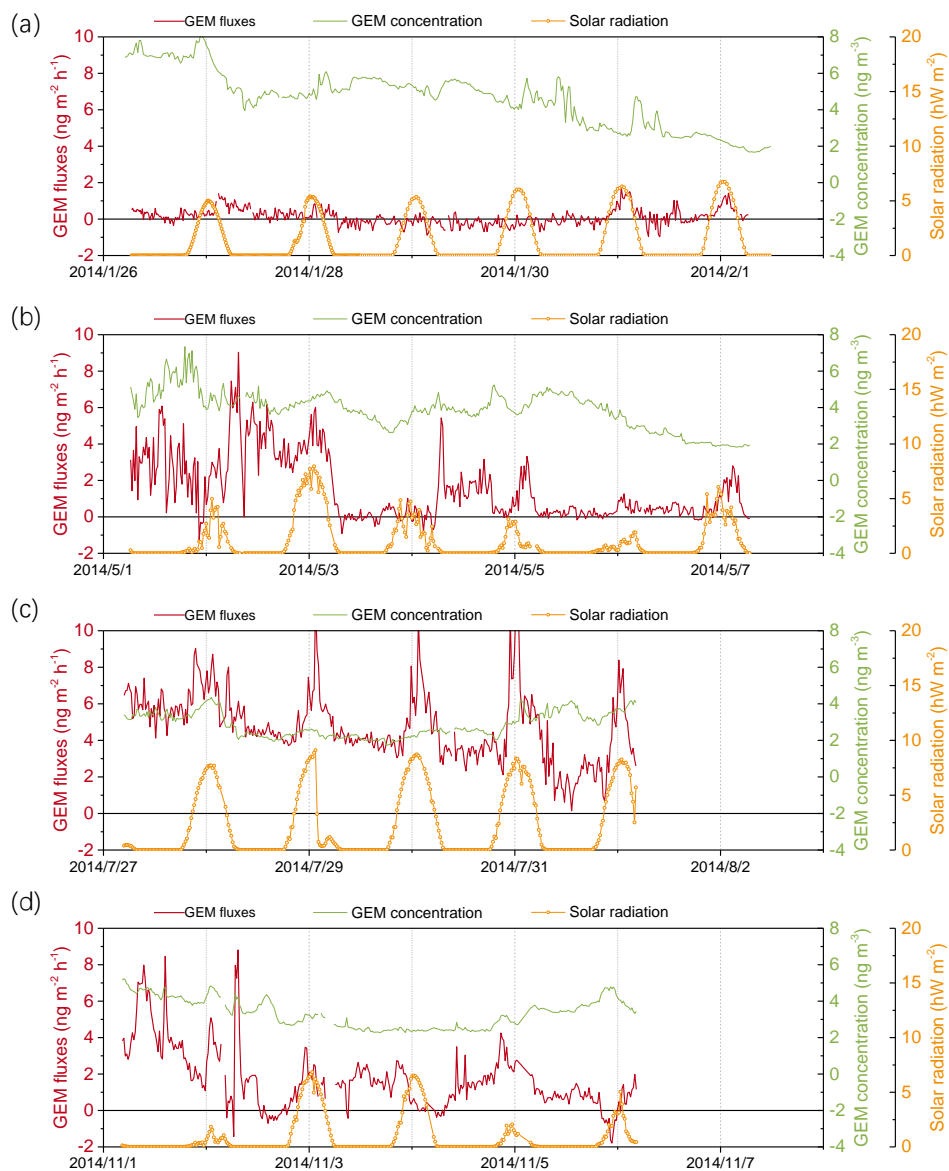

78

79 **Figure S6.** The diurnal variation of soil GEM emission fluxes, GEM concentrations and solar radiations in winter (a), spring (b), summer  
80 (c) and fall (d) (unpublished data).

81
