# Supplementary material for: Gaseous elemental mercury (GEM) fluxes over canopy of two typical subtropical forests in south China
Source: Copernicus journal article supplement (doi:10.5194/acp-18-495-2018), 2018-01-17
Supplement: Supplementary file 3 [file acp-18-495-2018-supplement.zip]

Archive with 3 entries (3 files):
- Data availability-Supplementary.pdf
- acp-18-495-2018-supplement-title-page.pdf
- acp-2017-349-supplement.pdf
