# Supplementary material for: Gaseous elemental mercury (GEM) fluxes over canopy of two typical subtropical forests in south China
Source: Copernicus journal article supplement (doi:10.5194/acp-18-495-2018), 2018-01-17
Supplement: Supplementary file 3 [file acp-18-495-2018-supplement.zip › Data availability-Supplementary.pdf]

Data for Figure 4. Diurnal variation in GEM fluxes, air temperature and solar radiation over forest canopy in each season.

| Time   | QYZ                                         |                                |                 | HT                                          |                                |                 | QYZ                                         |                                |                 | HT                                          |                                |                 |
|--------|---------------------------------------------|--------------------------------|-----------------|---------------------------------------------|--------------------------------|-----------------|---------------------------------------------|--------------------------------|-----------------|---------------------------------------------|--------------------------------|-----------------|
|        | Flux<br>ng m <sup>-2</sup> yr <sup>-1</sup> | Radiation<br>W m <sup>-2</sup> | Air Temp.<br>°C | Flux<br>ng m <sup>-2</sup> yr <sup>-1</sup> | Radiation<br>W m <sup>-2</sup> | Air Temp.<br>°C | Flux<br>ng m <sup>-2</sup> yr <sup>-1</sup> | Radiation<br>W m <sup>-2</sup> | Air Temp.<br>°C | Flux<br>ng m <sup>-2</sup> yr <sup>-1</sup> | Radiation<br>W m <sup>-2</sup> | Air Temp.<br>°C |
| Winter |                                             |                                |                 |                                             |                                | Summer          |                                             |                                |                 |                                             |                                |                 |
| 0.00   | -3.28                                       | 0.00                           | 18.44           | -3.82                                       | 0.01                           | 17.40           | 6.31                                        | 0.00                           | 24.63           | -15.94                                      | 0.03                           | 23.37           |
| 1.00   | -3.55                                       | 0.00                           | 18.08           | -24.79                                      | 0.02                           | 16.99           | 3.07                                        | 0.00                           | 24.37           | -25.18                                      | 0.02                           | 23.08           |
| 2.00   | -3.33                                       | 0.00                           | 17.83           | -16.24                                      | 0.02                           | 16.65           | 2.30                                        | 0.00                           | 24.11           | -31.14                                      | 0.03                           | 22.82           |
| 3.00   | -3.27                                       | 0.00                           | 17.53           | -15.61                                      | 0.04                           | 16.40           | 0.92                                        | 0.00                           | 23.93           | -15.91                                      | 0.03                           | 22.62           |
| 4.00   | -2.08                                       | 0.00                           | 17.29           | -18.34                                      | 0.03                           | 16.20           | -0.15                                       | 0.00                           | 23.72           | -9.47                                       | 0.03                           | 22.47           |
| 5.00   | -3.48                                       | 0.03                           | 17.12           | -22.02                                      | 0.03                           | 16.04           | -1.09                                       | 0.14                           | 23.55           | -0.84                                       | 0.03                           | 22.35           |
| 6.00   | -2.67                                       | 0.02                           | 16.94           | -18.40                                      | 0.11                           | 15.90           | 0.05                                        | 15.16                          | 23.54           | 0.94                                        | 4.03                           | 22.25           |
| 7.00   | -3.98                                       | 4.40                           | 17.02           | -14.41                                      | 15.93                          | 15.86           | -1.99                                       | 76.52                          | 24.00           | -3.46                                       | 43.75                          | 22.39           |
| 8.00   | -5.05                                       | 61.14                          | 18.02           | -6.23                                       | 86.16                          | 16.31           | -1.01                                       | 173.05                         | 25.06           | 8.87                                        | 124.07                         | 23.03           |
| 9.00   | -3.36                                       | 159.09                         | 19.43           | -6.22                                       | 202.41                         | 17.37           | 4.48                                        | 312.63                         | 26.33           | 17.28                                       | 239.99                         | 24.22           |
| 10.00  | 0.90                                        | 251.86                         | 20.75           | 5.49                                        | 349.30                         | 19.04           | 15.95                                       | 426.57                         | 27.55           | 30.99                                       | 373.42                         | 25.61           |
| 11.00  | 21.29                                       | 330.02                         | 21.96           | 12.61                                       | 450.97                         | 20.73           | 20.86                                       | 495.22                         | 28.55           | 44.04                                       | 473.97                         | 26.86           |
| 12.00  | 25.94                                       | 367.65                         | 22.84           | 13.82                                       | 516.18                         | 22.03           | 35.94                                       | 531.64                         | 29.37           | 46.16                                       | 524.20                         | 27.76           |
| 13.00  | 30.93                                       | 374.24                         | 23.54           | 17.96                                       | 514.50                         | 23.00           | 50.93                                       | 524.99                         | 29.96           | 36.16                                       | 532.34                         | 28.42           |
| 14.00  | 27.92                                       | 325.56                         | 23.93           | 21.75                                       | 483.23                         | 23.64           | 34.92                                       | 477.78                         | 30.22           | 24.86                                       | 490.20                         | 28.79           |
| 15.00  | 24.27                                       | 241.21                         | 24.05           | 22.66                                       | 397.50                         | 24.02           | 11.60                                       | 389.27                         | 30.14           | -3.74                                       | 432.75                         | 29.01           |
| 16.00  | 10.68                                       | 140.44                         | 23.80           | 5.20                                        | 263.15                         | 23.98           | 17.37                                       | 266.72                         | 29.65           | 11.02                                       | 324.46                         | 28.85           |
| 17.00  | -0.60                                       | 47.15                          | 23.05           | 11.39                                       | 128.85                         | 23.55           | 7.25                                        | 158.15                         | 28.95           | 14.54                                       | 223.72                         | 28.49           |
| 18.00  | -2.74                                       | 3.09                           | 21.97           | -9.36                                       | 27.12                          | 22.43           | 7.69                                        | 63.16                          | 28.11           | 8.18                                        | 110.22                         | 27.86           |
| 19.00  | -2.62                                       | 0.01                           | 20.94           | -4.61                                       | 0.83                           | 20.92           | 7.42                                        | 8.08                           | 27.04           | -7.59                                       | 23.72                          | 26.83           |
| 20.00  | -3.25                                       | 0.00                           | 20.10           | -9.10                                       | 0.01                           | 19.72           | 5.33                                        | 0.00                           | 26.13           | -9.78                                       | 0.23                           | 25.56           |
| 21.00  | -2.77                                       | 0.00                           | 19.45           | -9.09                                       | 0.02                           | 18.84           | 5.79                                        | 0.00                           | 25.55           | -26.86                                      | 0.04                           | 24.63           |
| 22.00  | -2.33                                       | 0.00                           | 19.00           | -5.81                                       | 0.02                           | 18.17           | 4.55                                        | 0.00                           | 25.17           | 6.25                                        | 0.05                           | 24.07           |
| 23.00  | -1.90                                       | 0.00                           | 18.60           | -13.65                                      | 0.02                           | 17.66           | 5.45                                        | 0.00                           | 24.85           | 6.14                                        | 0.04                           | 23.68           |
| 24.00  | 5.85                                        | 0.00                           | 18.44           | -13.82                                      | 0.01                           | 17.40           | 5.85                                        | 0.00                           | 18.44           | -13.82                                      | 0.01                           | 17.40           |
| Spring |                                             |                                |                 |                                             |                                | Fall            |                                             |                                |                 |                                             |                                |                 |
| 0.00   | 3.32                                        | 0.01                           | 15.39           | -6.47                                       | 2.13                           | 15.53           | 4.02                                        | 0.00                           | 18.44           | -15.87                                      | 0.01                           | 17.40           |
| 1.00   | 4.47                                        | 0.05                           | 15.20           | -4.34                                       | 2.28                           | 15.23           | 4.04                                        | 0.00                           | 18.08           | -13.57                                      | 0.02                           | 16.99           |

|       |       |        |       |        |        |       |       |        |       |        |        |       |
|-------|-------|--------|-------|--------|--------|-------|-------|--------|-------|--------|--------|-------|
| 2.00  | 5.47  | 0.06   | 14.96 | -13.66 | 2.21   | 14.97 | 2.97  | 0.00   | 17.83 | -16.44 | 0.02   | 16.65 |
| 3.00  | 0.95  | 0.09   | 14.71 | -9.91  | 1.63   | 14.71 | 0.92  | 0.00   | 17.53 | -19.40 | 0.04   | 16.40 |
| 4.00  | 0.75  | 0.06   | 14.42 | -6.33  | 2.49   | 14.56 | 1.78  | 0.00   | 17.29 | -8.68  | 0.03   | 16.20 |
| 5.00  | -1.80 | 0.05   | 14.21 | -6.29  | 2.45   | 14.46 | 1.97  | 0.00   | 17.12 | -4.53  | 0.03   | 16.04 |
| 6.00  | -2.74 | 3.92   | 14.04 | -11.53 | 3.05   | 14.35 | 2.25  | 2.21   | 16.94 | -4.65  | 0.11   | 15.90 |
| 7.00  | -4.21 | 41.38  | 14.14 | -9.60  | 28.42  | 14.37 | -2.27 | 46.04  | 17.02 | -8.49  | 15.93  | 15.86 |
| 8.00  | 1.93  | 121.63 | 14.95 | -1.77  | 97.85  | 14.72 | -2.75 | 139.24 | 18.02 | -14.55 | 86.16  | 16.31 |
| 9.00  | -7.94 | 226.70 | 16.05 | -0.21  | 209.54 | 15.46 | -3.55 | 242.75 | 19.43 | -8.95  | 202.41 | 17.37 |
| 10.00 | 6.18  | 311.79 | 17.20 | -6.48  | 322.27 | 16.51 | 9.33  | 340.94 | 20.75 | -15.59 | 349.30 | 19.04 |
| 11.00 | 15.63 | 365.38 | 18.19 | -25.39 | 415.89 | 17.54 | 16.04 | 404.50 | 21.96 | -7.31  | 450.97 | 20.73 |
| 12.00 | 20.01 | 385.89 | 18.89 | -15.47 | 497.03 | 18.36 | 21.91 | 427.40 | 22.84 | 18.49  | 516.18 | 22.03 |
| 13.00 | 29.30 | 372.72 | 19.32 | -2.16  | 519.86 | 18.97 | 29.63 | 420.48 | 23.54 | 42.65  | 514.50 | 23.00 |
| 14.00 | 24.91 | 322.34 | 19.55 | -0.11  | 462.14 | 19.39 | 23.78 | 364.47 | 23.93 | 44.68  | 483.23 | 23.64 |
| 15.00 | 12.29 | 262.61 | 19.68 | 46.21  | 418.71 | 19.59 | 18.51 | 277.96 | 24.05 | 40.57  | 397.50 | 24.02 |
| 16.00 | 15.89 | 185.13 | 19.63 | 36.72  | 298.39 | 19.65 | 13.55 | 171.59 | 23.80 | 27.16  | 263.15 | 23.98 |
| 17.00 | -1.34 | 90.77  | 19.32 | 31.41  | 193.12 | 19.53 | 7.85  | 72.53  | 23.05 | 8.33   | 128.85 | 23.55 |
| 18.00 | 2.69  | 24.82  | 18.59 | 27.08  | 76.60  | 19.08 | 8.99  | 10.80  | 21.97 | 2.95   | 27.12  | 22.43 |
| 19.00 | -0.31 | 0.69   | 17.66 | 11.27  | 10.04  | 18.30 | 7.28  | 0.09   | 20.94 | -11.44 | 0.83   | 20.92 |
| 20.00 | 0.54  | 0.11   | 16.93 | 3.72   | 2.56   | 17.46 | 5.80  | 0.01   | 20.10 | -9.65  | 0.01   | 19.72 |
| 21.00 | -1.39 | 0.07   | 16.44 | 7.06   | 1.93   | 16.87 | 5.10  | 0.01   | 19.45 | -11.59 | 0.02   | 18.84 |
| 22.00 | 0.30  | 0.00   | 16.07 | -10.81 | 2.10   | 16.44 | 6.21  | 0.01   | 19.00 | -9.90  | 0.02   | 18.17 |
| 23.00 | 1.14  | 0.00   | 15.72 | -13.09 | 2.04   | 16.07 | 5.39  | 0.01   | 18.60 | -13.91 | 0.02   | 17.66 |
| 24.00 | 5.85  | 0.00   | 18.44 | -13.82 | 0.01   | 17.40 | 5.85  | 0.00   | 18.44 | -13.82 | 0.01   | 17.40 |

Data for Figure 5. Monthly variations of GEM flux, GEM concentration and air temperature at sites QYZ and HT.

| Time | QYZ                                         |                                     |            | HT                                          |                                     |            |
|------|---------------------------------------------|-------------------------------------|------------|---------------------------------------------|-------------------------------------|------------|
|      | Flux<br>ng m <sup>-2</sup> yr <sup>-1</sup> | Concentration<br>ng m <sup>-3</sup> | Temp<br>°C | Flux<br>ng m <sup>-2</sup> yr <sup>-1</sup> | concentration<br>ng m <sup>-3</sup> | Temp<br>°C |
| Dec  | 3.13                                        | 4.30                                | 7.15       | 0.71                                        | -7.64                               | 6.59       |
| Jan  | 4.13                                        | 4.52                                | 8.40       | 0.84                                        | -3.60                               | 6.73       |
| Feb  | 9.20                                        | 3.26                                | 7.74       | 0.77                                        | 0.39                                | 4.29       |
| Mar  | 12.48                                       | 2.33                                | 13.48      | 1.35                                        | 2.40                                | 4.68       |
| Apr  | 1.56                                        | 3.18                                | 20.15      | 2.02                                        | 3.51                                | 4.89       |

|     |       |      |       |      |       |      |
|-----|-------|------|-------|------|-------|------|
| May | 1.72  | 3.98 | 19.94 | 1.99 | -3.42 | 6.36 |
| Jun | 4.40  | 4.32 | 26.07 | 2.61 | 1.79  | 6.74 |
| Jul | 11.55 | 2.89 | 28.86 | 2.89 | 4.54  | 3.84 |
| Aug | 12.79 | 3.13 | 26.94 | 2.69 | 6.86  | 4.40 |
| Sep | 8.90  | 3.08 | 26.19 | 2.62 | 3.59  | 4.97 |
| Oct | 7.85  | 3.84 | 21.22 | 2.12 | 2.02  | 6.80 |
| Nov | 6.84  | 4.25 | 14.83 | 1.48 | -6.82 | 7.14 |

Data for Figure 6. Monthly variation in daytime GEM flux and night GEM flux during the measurement periods at sites QYZ and HT

| Date        | Dec    | Jan    | Feb   | Mar   | Apr   | May    | Jun   | Jul   | Aug   | Sep   | Oct   | Nov   |
|-------------|--------|--------|-------|-------|-------|--------|-------|-------|-------|-------|-------|-------|
| QYZ-daytime |        |        |       |       |       |        |       |       |       |       |       |       |
| 1           | 10.03  | 2.37   | 24.92 | 2.86  | 12.61 | 22.22  |       | -0.84 |       | 2.28  | 11.23 | 13.87 |
| 2           | 7.33   | -9.29  | 15.43 | -0.07 | 15.14 | 26.29  |       | 6.13  |       | 4.82  | 5.25  |       |
| 3           | -8.01  | -5.29  | 18.73 |       | 4.99  | 5.28   |       | 11.35 | 12.12 | -4.71 | 44.20 |       |
| 4           | 3.57   | 8.68   | 11.28 | 0.16  | 3.05  | -15.68 |       | -5.14 | 39.90 | 5.51  | 33.18 |       |
| 5           | 18.77  | -5.03  | 8.27  | 18.74 | 24.63 | -38.56 |       | 18.48 | 22.12 | -5.47 | 4.95  |       |
| 6           | 66.40  | -18.15 | 4.86  | 3.46  |       | -18.52 | -8.17 | 27.09 | 11.60 | -2.37 | 19.06 | 6.17  |
| 7           | -16.43 | -12.47 | -5.50 | 0.37  | 2.53  | 59.88  | -6.57 | 35.98 | 2.11  | 7.35  | 6.69  | 11.07 |
| 8           | 31.50  | -3.30  | 6.10  | 3.54  | -7.19 | -4.42  | 13.91 | 37.16 | 12.83 | 8.37  | -1.03 | 13.78 |
| 9           | -10.18 | -1.66  | 7.77  | 22.61 | 13.22 | 22.22  | 10.43 | 28.87 | 18.92 | 16.92 | -2.52 | 2.27  |
| 10          | 31.87  | -0.24  | -1.78 | 15.14 | 14.49 | -2.10  | 13.73 | 21.56 | 22.44 | 18.55 | -8.26 | 13.84 |
| 11          | -8.83  | -3.71  | 10.97 | 4.99  | -8.69 | 8.31   | 4.78  | 41.87 | 6.88  | 12.62 | 10.98 | 20.35 |
| 12          | -17.66 | 7.79   | 14.52 | 3.05  | -9.32 | 2.06   | 6.25  | 1.17  | 32.46 | 18.15 | 11.46 | 19.53 |
| 13          | 24.73  | 3.13   | -0.92 | 24.63 | 6.41  | 4.32   | 14.20 |       | 6.35  | 18.80 | 13.89 | 29.73 |
| 14          | 27.24  | 20.98  | -0.93 | 42.20 | 13.50 | 49.32  | 10.12 | 32.44 | 13.75 | 20.50 | 23.13 | 21.06 |
| 15          | -36.46 | 20.38  |       | 29.75 | 26.48 | 21.34  | 1.24  | 34.99 | 19.67 | 9.42  | 44.91 | 30.97 |
| 16          | 22.44  | -6.88  |       | -9.32 | 15.85 | 8.56   | 0.02  | 22.18 | 27.69 | 8.77  | 13.04 | -3.14 |
| 17          | 24.99  | 79.45  | 3.58  | 26.41 | 3.94  | 4.02   | -2.90 | -8.87 | 60.83 | 18.30 | -7.82 | -6.10 |
| 18          | 12.18  | 15.30  | 10.79 | 17.78 | 17.78 | 6.25   | -3.76 | -7.66 | 22.09 | 16.50 | 13.63 | -5.65 |
| 19          | 7.30   | 19.02  | 9.81  | 26.48 | 3.35  | 7.33   | 1.05  | -7.46 | 21.28 | -5.08 | 4.49  | -0.46 |

|           |        |        |       |       |        |        |        |       |       |       |        |        |
|-----------|--------|--------|-------|-------|--------|--------|--------|-------|-------|-------|--------|--------|
| 20        | 14.93  | -7.51  | 67.21 | 15.85 | 18.51  | 25.71  | 5.63   | 2.11  | 31.09 | 6.33  | 2.74   | 2.54   |
| 21        | 36.82  | 15.71  | 19.15 | 29.94 | 11.91  | 16.28  | 15.24  | 17.30 | 57.54 | 10.08 | -12.31 | 9.65   |
| 22        | 33.07  | 92.94  | 34.26 | 40.78 | 1.01   | 35.23  | -4.03  | 24.93 | 28.14 | 14.65 | 22.16  | 23.49  |
| 23        | 28.64  | 66.02  | 31.76 | 33.48 | 0.43   | 1.12   | -2.79  | 46.82 | 19.03 | 19.96 | 26.42  |        |
| 24        | 36.36  | 19.02  | 12.47 | 38.29 | 2.52   | 4.82   | 8.63   | 3.07  | 24.74 | 10.83 | 2.79   | 49.79  |
| 25        | -18.87 | 7.32   | 4.65  | 49.90 | 35.59  | 32.03  | 21.79  | 34.73 | 23.20 | 23.07 | -7.91  | -1.03  |
| 26        | -25.48 | -15.20 | 10.26 | 58.17 | -4.70  | 17.99  | 16.79  | 37.24 | 10.10 | 18.75 | 14.54  | 4.84   |
| 27        | -7.89  | 126.13 | 55.08 | 14.49 | -38.46 |        | 19.23  | 1.99  | 11.33 | 34.88 | 15.94  | 28.19  |
| 28        | -8.01  | -0.93  | 1.60  | -8.69 | -18.52 |        | 17.69  | 38.64 | 2.36  | 33.30 | -9.56  | 8.00   |
| 29        | 22.55  | 26.57  |       | 29.35 | 59.88  |        | 24.82  | 16.36 | 5.34  | 36.01 | -10.25 | 10.02  |
| 30        | -1.73  | 5.45   |       | 33.50 | -4.42  |        | 6.64   |       | 45.45 | 1.73  | 23.43  | -26.15 |
| 31        |        |        |       | 3.35  |        |        |        |       | 12.13 |       | 3.68   |        |
| QYZ-night |        |        |       |       |        |        |        |       |       |       |        |        |
| 1         | -2.86  | -7.15  | 2.90  | 0.45  | 2.21   | -12.09 |        | 3.34  |       | 4.16  | 4.82   | 2.43   |
| 2         | -1.65  | -2.29  | 0.60  | 2.99  | -5.02  | -10.71 |        | 4.86  |       | 1.62  | 2.43   |        |
| 3         | -1.00  | -3.10  | 8.09  | 4.61  | -7.91  | -0.61  |        | 7.01  | 4.38  | -4.51 | 17.99  |        |
| 4         | -10.71 | 2.45   | 2.30  | 0.61  | 2.18   |        |        | 10.82 | -5.89 | -1.16 | 20.97  |        |
| 5         | 1.26   |        | -2.66 | 3.88  | -13.68 | -13.32 |        | 5.92  | 2.31  | -7.98 | 11.40  |        |
| 6         | -0.67  | -19.97 | -2.54 | 2.71  | -1.52  | 49.97  | -5.79  | 2.23  | 2.69  | -2.76 | 4.58   | 9.15   |
| 7         | -1.59  | -1.68  | -7.80 | 0.60  | -3.15  | -10.95 | -0.22  | 6.85  | -4.52 | -0.88 | 5.23   | 17.32  |
| 8         | -0.26  | -5.19  | -1.85 | -0.05 | -6.03  | -17.26 |        | 4.14  | 4.05  | 8.92  | 6.37   | 8.11   |
| 9         | -2.30  | -11.34 | 2.82  | 2.21  |        | -21.20 | -0.40  | 1.88  | 3.08  | 2.57  | 3.92   | 4.69   |
| 10        | -2.13  | -15.88 |       | 5.02  | 2.17   | -18.30 | -0.03  |       | 5.37  | 6.31  | 6.68   | -2.61  |
| 11        | -4.65  | 0.01   | 3.18  | 7.91  | -1.79  | -16.50 | 0.58   | 2.13  | 6.53  | 2.60  | 5.59   | 9.71   |
| 12        | -3.68  | -6.63  | 6.29  | 2.18  | -4.65  | 5.08   | -2.34  | 4.65  | 9.19  | 6.75  | -2.09  | 14.24  |
| 13        | -0.04  | -6.12  | -0.24 | 13.68 | -4.58  | -9.64  | 1.58   |       | 1.33  | 14.97 | 6.71   | 6.30   |
| 14        | -2.38  | 6.23   |       | 14.29 | -12.39 | -10.08 | -10.08 | 7.66  | 6.39  | 5.67  | -0.48  | -3.64  |
| 15        | -17.52 | -20.92 |       | 17.33 | 2.68   | -14.65 | 6.01   | 4.65  | -3.54 | 19.15 | 5.05   | 4.13   |
| 16        | -7.66  | 14.55  |       | -4.65 | -12.76 | -19.96 | -0.61  | 5.17  | 7.27  |       | 1.95   | 0.23   |
| 17        | -4.65  |        | 14.55 | 4.58  | -9.52  | -10.83 | -3.43  | -5.94 | 17.20 | -2.10 | -1.62  | 0.57   |

|    |        |        |       |       |        |        |       |       |       |       |       |       |
|----|--------|--------|-------|-------|--------|--------|-------|-------|-------|-------|-------|-------|
| 18 | -5.17  | -0.91  | 1.24  | 2.19  | 2.19   | -23.07 | 3.22  | 3.68  | 12.54 | 8.31  | -4.52 | -2.67 |
| 19 | -9.08  | -7.67  | 0.27  | 2.68  | -12.52 | -18.75 | 7.16  | 17.52 | 25.73 | 2.06  | -7.12 | -1.44 |
| 20 | -4.32  | -7.77  | 7.00  | 12.76 | 8.50   | -34.88 | 6.81  | -1.79 | 0.94  | 4.32  | 1.96  | 2.88  |
| 21 | -2.65  | -2.42  | -4.75 | 0.52  | 1.85   | -2.33  | -8.10 | 9.08  | 10.97 | 21.69 | 5.77  | 1.23  |
| 22 | -2.61  | -0.98  | 5.39  | 4.28  | -0.81  | 10.33  | -2.53 | 4.32  | 8.83  | 11.05 | 2.26  | 2.17  |
| 23 | 0.43   | -9.21  | 3.27  | 1.83  | 6.97   | -1.73  | 0.17  | -2.65 | 0.89  | 8.56  | -1.37 |       |
| 24 | -0.38  | -31.84 | 2.34  | 5.30  | -7.54  | -21.35 | 6.09  | -2.61 | 3.17  | 4.02  | -3.46 | -2.17 |
| 25 | -5.94  | -17.95 | 2.54  | 5.61  |        | -19.25 | -7.40 | 0.04  | 2.23  | 0.28  | -6.64 | -3.99 |
| 26 | -15.57 | -20.10 | 1.69  | 11.31 | -1.01  | -13.23 | 3.43  | 2.38  | 1.35  | 7.33  | 2.39  | 4.12  |
| 27 | -1.79  |        | 5.45  | 2.17  | -13.32 |        | 12.95 | -1.00 | -5.27 | 17.79 | -1.97 | 0.38  |
| 28 | -1.00  | -0.08  | 0.34  | -1.79 | 49.97  |        | 15.31 | 0.43  | 1.30  | 16.28 | -5.12 | 10.82 |
| 29 | 0.14   | 0.13   |       | 2.52  | -10.95 |        | -3.08 | -0.38 | 0.03  | 2.64  | -5.04 | 9.87  |
| 30 |        |        |       | -0.39 | -17.26 |        | -1.31 |       | 5.34  | 1.12  | -0.43 | -4.36 |
| 31 |        | 2.55   |       | 9.87  |        |        |       |       | -2.23 |       | 3.23  |       |

| HT-daytime |        |        |        |        |        |        |         |        |        |        |        |        |
|------------|--------|--------|--------|--------|--------|--------|---------|--------|--------|--------|--------|--------|
| 1          | -53.48 | 55.22  | 86.20  | 12.26  | 24.25  | 11.30  | -78.32  | 91.64  | 67.95  | 98.97  | 51.86  | 37.08  |
| 2          | -4.85  | 25.23  | 13.46  | 7.93   | 63.09  | -8.91  | -44.86  | 98.57  | -25.93 | -12.21 | -38.27 | 11.76  |
| 3          | -84.05 | -30.52 | 26.83  | -0.86  | 33.40  | -8.51  | -10.58  | -8.89  | -20.73 | 61.73  | 2.48   | 47.11  |
| 4          | 64.34  | 28.95  | 14.33  | -7.71  | 41.00  | 5.74   | 34.35   | -61.02 | 105.34 | -2.91  | 33.40  | 9.95   |
| 5          | 54.34  | -28.23 | 42.70  |        | 55.56  | 22.21  | 154.47  | 52.86  | 112.65 | -77.38 | -40.26 | 15.56  |
| 6          | 67.23  | 16.05  | -31.03 | -12.17 | -15.13 | 29.09  | 135.42  | -44.26 | -27.02 | -11.75 | -1.76  | -20.07 |
| 7          | 87.79  | -2.26  | -13.62 | 2.53   | -17.68 | 99.30  | 148.72  | -1.52  | -10.40 | 81.20  | -5.35  | -23.66 |
| 8          | -6.60  | 0.11   | -66.38 | -5.34  | -9.59  | 35.42  | 112.26  | 15.37  | -30.87 | -12.80 | -8.15  | 84.20  |
| 9          | 22.57  | -16.02 | -58.20 | -50.54 | 53.84  | 27.08  | -54.08  | 7.56   | 0.83   | 71.04  | 1.97   | 60.01  |
| 10         | 0.09   | 6.15   | 54.11  | 23.00  | 50.67  | 1.76   | 43.35   | 70.64  | 2.08   | 16.28  | 62.61  | 20.38  |
| 11         | 72.02  | -27.75 | 16.01  | 6.01   | 36.42  | -13.62 | -114.02 | 83.23  | -8.51  | 88.07  | 77.85  | -35.98 |
| 12         | 28.89  | -29.80 | 58.86  | 11.78  | 53.73  | 74.20  | -94.03  | 31.16  | 5.41   | 36.11  | -62.72 | 28.45  |
| 13         | 46.39  | -3.98  | 9.89   | 61.02  | -9.42  | 50.01  | 51.48   | 11.42  | 5.17   | 67.67  | 6.19   | 34.20  |
| 14         | 6.27   | 2.59   | -12.72 | 21.09  | 96.23  | -56.61 | 35.62   | 36.86  | -46.55 | 80.41  | -16.17 | -15.06 |
| 15         | 23.35  | 39.30  | -60.84 | 21.94  | 67.44  | 37.11  | 41.28   | 57.32  | 26.01  | 65.21  | -7.75  |        |

|          |        |        |        |        |         |        |         |        |        |        |        |        |
|----------|--------|--------|--------|--------|---------|--------|---------|--------|--------|--------|--------|--------|
| 16       | 12.13  | -7.01  | -80.64 | -48.10 | 73.14   | 19.95  | 23.25   | 135.34 | 14.98  | 31.16  | 28.21  | 80.35  |
| 17       | 4.35   | -4.00  | -31.37 | 41.55  | 47.74   | 25.56  | 14.51   | 127.26 | 27.34  | -5.99  | 38.58  | 44.49  |
| 18       | -90.47 | 81.22  | -14.15 | 92.29  | 33.11   | -5.06  | -13.16  | 36.11  | -6.06  | 36.86  | -0.67  | 17.18  |
| 19       | 67.15  | 31.36  | 84.90  | 39.97  | 27.00   | -45.98 | -81.56  | 89.67  | -3.55  |        | 7.97   | 16.62  |
| 20       | -7.56  | -12.48 | 23.51  | -1.11  | -25.17  | -78.45 | -82.38  | 65.21  | 16.04  | -21.03 | 14.21  | 41.25  |
| 21       | -32.28 | 79.50  | -16.14 | -82.86 | 17.68   | 44.20  | 23.45   | 41.96  | 127.42 | 26.92  | 11.23  | 21.74  |
| 22       | -9.75  | 142.35 | 12.36  | 19.02  | 40.92   | -10.07 | 69.81   | 58.91  | 79.87  | 0.49   | -12.11 | 9.12   |
| 23       | 64.13  | 58.35  | 5.38   | 1.80   | 36.35   | -13.66 | 35.80   | 71.86  | 47.01  | -25.51 | 11.92  | 9.93   |
| 24       | 13.80  | 32.35  | 7.95   |        | 10.35   | 17.62  | -68.12  | 35.24  | 4.78   | -10.53 | 56.35  | 6.32   |
| 25       | 0.09   | 55.62  | 13.70  | 32.35  | -17.87  | -74.22 | 101.04  | 45.66  | -66.52 |        | 16.35  | 1.18   |
| 26       | -13.23 | -33.27 | 17.89  | 36.11  | -0.99   | 45.35  | 166.52  | 17.04  | 16.51  |        | -11.30 | -18.05 |
| 27       | -11.16 | 22.33  | 28.35  | 63.12  | 20.98   | 8.00   | 95.87   |        | 18.24  | 36.42  | 2.75   | 23.67  |
| 28       | -10.00 | 9.68   | 46.36  | 63.83  | 25.97   | -7.89  | 56.25   |        | -2.31  | -3.12  | -2.93  | -19.54 |
| 29       | 18.35  | -11.64 |        | -17.16 | -100.34 | -35.44 | -5.98   | 36.42  | 1.82   | 41.96  | -10.13 | -52.42 |
| 30       | 164.28 | 38.41  |        | 17.75  | 12.25   | -42.35 | -10.35  | 61.92  | 13.23  | 58.91  | -3.08  | 49.40  |
| 31       | -24.03 | -80.34 |        | 18.79  |         | 71.34  |         | 82.24  | 154.91 |        | -13.02 |        |
| HT-night |        |        |        |        |         |        |         |        |        |        |        |        |
| 1        | -52.42 | 65.00  | 11.15  | 0.12   | -11.73  | 2.76   | -25.62  | -22.91 | -19.25 | -3.00  | 7.56   | -12.21 |
| 2        | -66.66 | -13.73 | -3.28  | 0.70   | 11.42   | 1.00   | -38.69  | -30.68 | -29.03 | -17.38 | -20.81 | -8.34  |
| 3        | -96.32 | -45.33 | -2.32  | -27.73 | 13.38   | -17.36 | -45.35  | -30.29 | -14.33 | 14.75  | 65.30  | 4.33   |
| 4        | -12.32 | 2.12   | 5.50   | -9.96  | 11.69   | 4.34   | -18.25  | -12.41 | -33.43 | -7.84  | -1.26  | -11.67 |
| 5        | 12.34  | -9.12  | 20.75  |        | -45.79  | -4.23  | 12.24   | -19.59 | -6.43  | -27.87 | -12.46 | -33.96 |
| 6        | 7.46   | -25.06 | -31.30 | 5.00   | -64.93  | 31.13  | -34.23  | -25.51 | 1.77   | -24.89 | -2.23  | 1.05   |
| 7        | -11.62 | -14.06 | -23.23 | -19.30 | -57.52  | -6.86  | 21.46   | -52.53 | 2.30   | -8.25  | 56.35  | 7.19   |
| 8        | 9.43   | -0.25  | -57.57 | -7.74  | -49.08  | 40.68  | -18.13  | -5.54  | -0.37  | -6.64  | -7.54  | 59.19  |
| 9        | -22.84 | -7.04  | -7.82  | -10.18 | -28.60  | -22.21 | -105.12 | -46.21 | 32.14  | 11.90  | -40.39 | -27.94 |
| 10       | -2.69  | 8.58   | 29.72  | 44.38  | -45.25  | -18.34 | -57.84  | -37.38 | 10.93  | 9.75   | 20.64  | -66.61 |
| 11       | 11.82  | -29.01 | 86.09  | -5.52  | 11.92   | -2.58  | -32.62  | -3.12  | -15.17 | -28.60 | -3.80  | -60.09 |
| 12       | -56.08 | -29.29 | 14.60  | -25.70 | -37.00  | 49.19  | -5.83   | -46.69 | 6.17   | -45.25 | -23.99 | -14.35 |
| 13       | -58.58 | -18.17 | 15.87  | -20.17 | -49.44  | -87.94 | -107.69 | -27.53 | 6.73   | -37.00 | -15.41 | -27.49 |

|    |        |        |         |        |        |         |         |        |        |        |        |        |
|----|--------|--------|---------|--------|--------|---------|---------|--------|--------|--------|--------|--------|
| 14 | -34.46 | -9.56  | -2.62   | -1.22  | -56.85 | 30.38   | -41.94  | -43.55 | 2.07   | 12.24  | -23.73 | -1.34  |
| 15 | -26.23 | -9.12  | -110.68 | -45.41 | 6.46   | -5.67   | -119.36 | -10.53 | 12.51  | 45.66  | 27.73  |        |
| 16 | -37.55 | -38.96 | -25.80  | -7.74  | 11.10  | -1.67   | -45.23  | 5.93   | -9.03  | 17.04  | 41.07  | -36.17 |
| 17 | -3.23  | -0.09  | 17.27   | 33.64  | 35.07  | -23.96  | -62.25  | -27.68 | -0.72  | 11.42  | 6.98   | -48.51 |
| 18 | -27.08 | -16.42 | -21.16  | 50.29  | 14.85  | 8.66    | 53.13   | -49.44 | 1.60   | -5.54  | -4.99  | -51.13 |
| 19 | -36.87 | -12.42 | -7.06   | -9.21  | 3.83   | -83.09  | 34.23   | -23.82 | 19.71  |        | 1.98   | -16.35 |
| 20 | -5.81  | -15.27 | -5.97   | -13.26 | -2.23  | -4.35   | -25.93  | -18.40 | -21.78 | -57.38 | 6.45   | 1.00   |
| 21 | -15.74 | -11.44 | -7.40   | 27.92  | -7.76  | -67.49  | 105.02  | -44.85 | -19.83 | -34.85 | -2.11  | -10.89 |
| 22 | -24.11 | -6.35  | -16.18  | 22.17  | -29.77 | 11.05   | 57.28   | -32.91 | -8.13  | -56.69 | -5.61  | 5.88   |
| 23 | 4.47   | 4.44   | 3.38    | -34.45 | -33.25 | 17.19   | -105.13 | -47.48 | -5.35  | -87.68 | 12.32  | -9.63  |
| 24 | 7.12   | -40.35 | -0.10   |        | -71.38 | -21.03  | 66.51   | -5.44  | -98.19 | -43.55 | -27.42 | -5.42  |
| 25 | -6.90  | -17.76 | -22.08  | 5.35   | -10.70 | -114.64 | 7.10    | -21.03 | 1.81   |        | -34.58 | -45.45 |
| 26 | -8.55  | -56.75 | 6.13    | -14.21 | -15.60 | -47.00  | 25.38   | 0.49   | 31.78  |        | -10.53 | 3.48   |
| 27 | 17.19  | -13.24 | -1.40   | -1.09  | 2.44   | -1.92   | -42.67  |        | -9.26  | -45.53 | 29.93  | -26.89 |
| 28 | 5.79   | -32.23 | 7.71    | -46.38 | -2.28  | 14.80   | -34.43  |        | -10.50 | -52.53 | 5.14   | -1.33  |
| 29 | -19.45 | -36.02 |         | -66.05 | -64.49 | -45.35  | -12.24  | -15.25 | 15.61  | -5.44  | -15.44 | 4.78   |
| 30 | -4.70  | -71.92 |         | -14.73 | -23.23 | -85.43  | -24.60  | -37.00 | -17.17 | -23.82 | -32.55 | 4.30   |
| 31 | -9.37  |        |         | -39.90 |        | 6.34    |         | -31.68 | -8.43  |        | -16.50 |        |

Data for Figure 7. The GEM flux, concentration and environmental conditions on some typical days in each season at sites QYZ and HT.

| QYZ      |                                             |                                     |             |                                |                | HT        |                                             |                                     |             |                                |
|----------|---------------------------------------------|-------------------------------------|-------------|--------------------------------|----------------|-----------|---------------------------------------------|-------------------------------------|-------------|--------------------------------|
| Date     | Flux<br>ng m <sup>-2</sup> yr <sup>-1</sup> | Concentration<br>ng m <sup>-3</sup> | Temp.<br>°C | Radiation<br>W m <sup>-2</sup> | Rainfall<br>mm | Date      | Flux<br>ng m <sup>-2</sup> yr <sup>-1</sup> | Concentration<br>ng m <sup>-3</sup> | Temp.<br>°C | Radiation<br>W m <sup>-2</sup> |
| 2014/2/1 | 1.02                                        | 2.70                                | 20.69       | 0.00                           | 0.00           | 2014/2/16 | -120.12                                     | 4.19                                | 4.09        | 0.00                           |
| 2014/2/1 | 2.64                                        | 2.49                                | 19.44       | 0.00                           | 0.00           | 2014/2/16 | -78.92                                      | 4.60                                | 3.86        | 0.00                           |
| 2014/2/1 | 3.21                                        | 2.46                                | 18.80       | 0.00                           | 0.00           | 2014/2/16 | -143.08                                     | 5.00                                | 3.57        | 0.00                           |
| 2014/2/1 | 5.15                                        | 2.43                                | 19.07       | 0.00                           | 0.00           | 2014/2/16 | -173.80                                     | 5.08                                | 3.34        | 0.00                           |
| 2014/2/1 | 2.44                                        | 2.52                                | 18.78       | 0.00                           | 0.00           | 2014/2/16 | -179.93                                     | 5.08                                | 3.17        | 0.00                           |
| 2014/2/1 | 1.77                                        | 2.50                                | 16.49       | 0.00                           | 0.00           | 2014/2/16 | -182.59                                     | 5.13                                | 2.95        | 0.00                           |
| 2014/2/1 | 1.62                                        | 2.66                                | 14.16       | 0.00                           | 0.00           | 2014/2/16 | -76.59                                      | 5.10                                | 2.57        | 0.00                           |

|          |        |      |       |        |      |           |         |      |      |        |
|----------|--------|------|-------|--------|------|-----------|---------|------|------|--------|
| 2014/2/1 | 3.83   | 2.68 | 15.05 | 5.57   | 0.00 | 2014/2/16 | -169.76 | 5.12 | 2.45 | 0.00   |
| 2014/2/1 | 2.97   | 2.64 | 15.90 | 108.44 | 0.00 | 2014/2/16 | -149.15 | 4.84 | 2.44 | 5.40   |
| 2014/2/1 | 4.76   | 2.58 | 17.96 | 301.84 | 0.00 | 2014/2/16 | 30.00   | 4.82 | 2.53 | 18.95  |
| 2014/2/1 | -0.91  | 2.56 | 20.98 | 476.23 | 0.00 | 2014/2/16 | -169.21 | 4.99 | 2.63 | 34.57  |
| 2014/2/1 | 47.48  | 2.41 | 23.14 | 605.11 | 0.00 | 2014/2/16 | -110.88 | 4.84 | 2.86 | 46.54  |
| 2014/2/1 | 89.35  | 2.36 | 24.21 | 669.51 | 0.00 | 2014/2/16 | -234.79 | 4.93 | 3.18 | 57.13  |
| 2014/2/1 | 112.15 | 2.25 | 25.15 | 663.66 | 0.00 | 2014/2/16 | -246.88 | 4.73 | 3.44 | 65.47  |
| 2014/2/1 | 37.37  | 2.15 | 25.44 | 588.28 | 0.00 | 2014/2/16 | -45.14  | 5.35 | 3.71 | 62.69  |
| 2014/2/1 | -3.70  | 2.01 | 25.76 | 469.52 | 0.00 | 2014/2/16 | 48.08   | 5.88 | 3.80 | 66.49  |
| 2014/2/1 | 3.56   | 1.95 | 25.44 | 293.60 | 0.00 | 2014/2/16 | 50.26   | 5.67 | 3.70 | 42.51  |
| 2014/2/1 | -2.36  | 1.96 | 24.34 | 111.96 | 0.00 | 2014/2/16 | 60.82   | 5.64 | 3.39 | 18.94  |
| 2014/2/1 | 4.51   | 1.81 | 22.39 | 9.60   | 0.00 | 2014/2/16 | -31.08  | 5.74 | 3.09 | 6.44   |
| 2014/2/1 | -0.15  | 1.69 | 20.65 | 0.00   | 0.00 | 2014/2/16 | 33.66   | 5.59 | 2.91 | 0.00   |
| 2014/2/1 | 0.20   | 1.69 | 17.91 | 0.00   | 0.00 | 2014/2/16 | -35.88  | 5.44 | 2.85 | 0.00   |
| 2014/2/1 | -0.80  | 1.71 | 16.34 | 0.00   | 0.00 | 2014/2/16 | 82.88   | 5.56 | 2.91 | 0.00   |
| 2014/2/1 | 3.32   | 1.82 | 15.67 | 0.00   | 0.00 | 2014/2/16 | 30.00   | 5.66 | 2.94 | 0.00   |
| 2014/2/1 | 2.85   | 1.90 | 15.52 | 0.00   | 0.00 | 2014/2/16 | 175.51  | 5.64 | 2.87 | 0.00   |
| 2014/2/1 | 10.27  | 1.96 | 14.40 | 0.00   | 0.00 | 2014/2/17 | 30.00   |      | 2.86 | 0.00   |
| 2014/2/2 |        | 2.06 | 13.09 | 0.00   | 0.00 | 2014/2/17 | -93.31  | 6.49 | 2.77 | 0.00   |
| 2014/2/2 | 2.24   | 2.02 | 13.29 | 0.00   | 0.00 | 2014/2/17 | -165.16 | 6.34 | 2.70 | 0.00   |
| 2014/2/2 | 7.17   | 2.03 | 11.76 | 0.00   | 0.00 | 2014/2/17 | -114.78 | 5.65 | 2.64 | 0.00   |
| 2014/2/2 | 1.00   | 2.34 | 11.77 | 0.00   | 0.00 | 2014/2/17 | -122.95 | 4.74 | 2.63 | 0.00   |
| 2014/2/2 |        | 2.27 | 11.40 | 0.00   | 0.00 | 2014/2/17 | -26.15  | 3.48 | 2.57 | 0.00   |
| 2014/2/2 |        | 2.12 | 10.38 | 0.00   | 0.00 | 2014/2/17 | -103.37 | 3.18 | 2.56 | 0.00   |
| 2014/2/2 |        | 2.04 | 10.87 | 6.39   | 0.00 | 2014/2/17 | 6.77    | 2.94 | 2.56 | 0.43   |
| 2014/2/2 | 4.26   | 2.20 | 10.81 | 110.12 | 0.00 | 2014/2/17 | -21.33  | 2.88 | 2.62 | 12.72  |
| 2014/2/2 | 14.01  | 2.41 | 14.00 | 294.36 | 0.00 | 2014/2/17 | -32.63  | 2.77 | 2.89 | 32.63  |
| 2014/2/2 | 8.24   | 2.70 | 17.57 | 467.00 | 0.00 | 2014/2/17 | -47.32  | 2.75 | 3.12 | 56.29  |
| 2014/2/2 | 5.06   | 2.70 | 21.19 | 590.92 | 0.00 | 2014/2/17 | -35.28  | 2.49 | 3.41 | 97.15  |
| 2014/2/2 | 39.36  | 2.51 | 23.76 | 664.67 | 0.00 | 2014/2/17 | -64.06  | 2.57 | 3.60 | 112.70 |
| 2014/2/2 | 84.96  | 2.41 | 24.49 | 671.01 | 0.00 | 2014/2/17 | -82.57  | 2.44 | 3.64 | 97.20  |
| 2014/2/2 | 3.28   | 2.35 | 25.09 | 513.84 | 0.00 | 2014/2/17 | -72.19  | 2.58 | 3.81 | 107.94 |
| 2014/2/2 | 7.24   | 2.26 | 25.07 | 402.56 | 0.00 | 2014/2/17 | 43.19   | 2.34 | 3.66 | 83.59  |
| 2014/2/2 | -0.38  | 2.15 | 25.34 | 317.03 | 0.00 | 2014/2/17 | -179.07 | 3.68 | 3.74 | 60.51  |

|          |        |      |       |        |      |           |        |      |      |        |
|----------|--------|------|-------|--------|------|-----------|--------|------|------|--------|
| 2014/2/2 | 2.74   | 2.07 | 24.52 | 123.20 | 0.00 | 2014/2/17 | 56.67  | 3.50 | 3.54 | 28.03  |
| 2014/2/2 | 0.96   | 2.05 | 22.61 | 9.14   | 0.00 | 2014/2/17 | 51.41  | 3.61 | 3.26 | 6.96   |
| 2014/2/2 | 2.21   | 2.07 | 21.06 | 0.00   | 0.00 | 2014/2/17 | 2.34   | 3.70 | 3.12 | 0.00   |
| 2014/2/2 | 1.59   | 2.08 | 19.22 | 0.00   | 0.00 | 2014/2/17 | -11.66 | 3.83 | 3.05 | 0.00   |
| 2014/2/2 | 0.76   | 2.10 | 18.09 | 0.00   | 0.00 | 2014/2/17 | 24.49  | 3.91 | 3.03 | 0.00   |
| 2014/2/2 | 0.40   | 2.15 | 16.23 | 0.00   | 0.00 | 2014/2/17 | 65.36  | 3.86 | 2.95 | 0.00   |
| 2014/2/2 | 0.00   | 2.18 | 15.13 | 0.00   | 0.00 | 2014/2/17 | 29.72  | 3.69 | 2.78 | 0.00   |
| 2014/2/2 |        | 2.16 | 14.57 | 0.00   | 0.00 | 2014/2/17 | 20.12  | 3.35 | 2.56 | 0.00   |
| 2014/2/3 | 0.00   | 2.13 | 13.21 | 0.00   | 0.00 | 2014/2/18 | 8.11   | 3.18 | 2.47 | 0.00   |
| 2014/2/3 |        | 2.16 | 12.14 | 0.00   | 0.00 | 2014/2/18 | -12.22 | 3.29 | 2.34 | 0.00   |
| 2014/2/3 | -1.11  | 2.20 | 11.80 | 0.00   | 0.00 | 2014/2/18 | -12.72 | 3.45 | 2.19 | 0.00   |
| 2014/2/3 |        | 2.15 | 11.82 | 0.00   | 0.00 | 2014/2/18 | 115.82 | 3.31 | 2.06 | 0.00   |
| 2014/2/3 | 0.00   | 2.14 | 11.49 | 0.00   | 0.00 | 2014/2/18 | -12.07 | 3.41 | 1.54 | 0.00   |
| 2014/2/3 | 1.51   | 2.16 | 10.51 | 0.00   | 0.00 | 2014/2/18 | -10.03 | 3.28 | 0.84 | 0.00   |
| 2014/2/3 | 0.88   | 2.18 | 10.23 | 5.87   | 0.00 | 2014/2/18 | -61.24 | 3.34 | 0.53 | 0.00   |
| 2014/2/3 | 0.00   | 2.23 | 11.18 | 106.94 | 0.00 | 2014/2/18 | -16.87 | 3.42 | 0.28 | 4.59   |
| 2014/2/3 | 0.00   | 2.24 | 13.34 | 293.62 | 0.00 | 2014/2/18 | -45.18 | 3.49 | 0.07 | 13.16  |
| 2014/2/3 | 4.43   | 2.50 | 16.80 | 463.28 | 0.00 | 2014/2/18 | -13.64 | 3.87 | 0.20 | 29.42  |
| 2014/2/3 | 22.73  | 2.61 | 19.98 | 587.90 | 0.00 | 2014/2/18 | -8.03  | 4.16 | 0.54 | 58.93  |
| 2014/2/3 | 90.84  | 2.62 | 22.14 | 657.22 | 0.00 | 2014/2/18 | -34.56 | 4.34 | 0.75 | 73.61  |
| 2014/2/3 | 76.33  | 2.49 | 23.75 | 670.15 | 0.00 | 2014/2/18 | 43.70  | 4.26 | 1.12 | 77.23  |
| 2014/2/3 | 5.20   | 2.44 | 24.84 | 610.75 | 0.00 | 2014/2/18 | -30.83 | 4.21 | 1.40 | 101.27 |
| 2014/2/3 | 7.42   | 2.40 | 25.38 | 474.47 | 0.00 | 2014/2/18 | 28.06  | 3.99 | 1.66 | 120.75 |
| 2014/2/3 | 6.81   | 2.34 | 25.45 | 312.01 | 0.00 | 2014/2/18 | -6.78  | 3.79 | 1.94 | 122.37 |
| 2014/2/3 | 7.35   | 2.11 | 24.67 | 113.72 | 0.00 | 2014/2/18 | 11.56  | 3.74 | 1.83 | 88.30  |
| 2014/2/3 | 2.74   | 2.14 | 23.07 | 9.65   | 0.00 | 2014/2/18 | -36.03 | 3.62 | 1.74 | 19.71  |
| 2014/2/3 | -20.48 | 3.56 | 21.29 | 0.00   | 0.00 | 2014/2/18 | -24.44 | 3.67 | 1.50 | 0.18   |
| 2014/2/3 | 7.69   | 3.99 | 19.78 | 0.00   | 0.00 | 2014/2/18 | -44.66 | 3.64 | 1.42 | 0.00   |
| 2014/2/3 | 13.68  | 4.22 | 17.85 | 0.00   | 0.00 | 2014/2/18 | 27.24  | 3.51 | 1.22 | 0.00   |
| 2014/2/3 | 4.07   | 4.70 | 16.44 | 0.00   | 0.00 | 2014/2/18 | -4.47  | 3.56 | 1.26 | 0.00   |
| 2014/2/3 | 11.90  | 5.09 | 14.87 | 0.00   | 0.00 | 2014/2/18 | 4.56   | 3.48 | 0.94 | 0.00   |
| 2014/2/3 | 8.48   | 5.39 | 13.77 | 0.00   | 0.00 | 2014/2/18 | -52.01 | 3.59 | 0.86 | 0.00   |
| 2014/2/4 | 17.96  | 5.86 | 12.87 | 0.00   | 0.00 | 2014/2/19 | -13.39 | 3.79 | 0.37 | 0.00   |
| 2014/2/4 | 9.79   | 6.18 | 12.35 | 0.00   | 0.00 | 2014/2/19 | -10.24 | 3.81 | 0.18 | 0.00   |

|          |       |      |       |        |      |           |         |      |       |        |
|----------|-------|------|-------|--------|------|-----------|---------|------|-------|--------|
| 2014/2/4 | 8.98  | 6.41 | 11.92 | 0.00   | 0.00 | 2014/2/19 | -50.42  | 3.84 | 0.07  | 0.00   |
| 2014/2/4 | 8.90  | 6.44 | 11.62 | 0.00   | 0.00 | 2014/2/19 | -57.02  | 3.82 | 0.19  | 0.00   |
| 2014/2/4 | 11.40 | 6.27 | 11.44 | 0.00   | 0.00 | 2014/2/19 | -31.56  | 3.81 | -0.35 | 0.00   |
| 2014/2/4 | 14.71 | 5.79 | 11.13 | 0.00   | 0.00 | 2014/2/19 | 2.50    | 3.65 | -0.54 | 0.00   |
| 2014/2/4 | 9.10  | 5.41 | 10.75 | 0.41   | 0.00 | 2014/2/19 | 58.69   | 3.52 | -0.40 | 1.34   |
| 2014/2/4 | 13.89 | 5.16 | 10.28 | 5.28   | 0.00 | 2014/2/19 | 45.26   | 3.70 | -0.11 | 79.55  |
| 2014/2/4 | 16.65 | 4.77 | 10.02 | 15.34  | 0.00 | 2014/2/19 | 52.04   | 3.89 | 1.09  | 236.61 |
| 2014/2/4 | 4.84  | 4.34 | 9.21  | 27.46  | 0.00 | 2014/2/19 | 363.34  | 4.12 | 3.45  | 534.03 |
| 2014/2/4 | 11.91 | 4.02 | 8.80  | 36.91  | 0.00 | 2014/2/19 | 225.88  | 3.93 | 4.65  | 398.10 |
| 2014/2/4 | 8.33  | 3.80 | 8.88  | 45.78  | 0.00 | 2014/2/19 | 158.42  | 3.99 | 5.63  | 548.99 |
| 2014/2/4 | 8.43  | 3.77 | 8.93  | 56.64  | 0.00 | 2014/2/19 | 29.79   | 4.50 | 7.11  | 715.34 |
| 2014/2/4 | 18.41 | 3.50 | 8.95  | 38.27  | 0.00 | 2014/2/19 | 7.08    | 3.55 | 7.60  | 527.64 |
| 2014/2/4 | 17.90 | 3.34 | 8.72  | 19.92  | 0.00 | 2014/2/19 | 32.75   | 3.10 | 8.43  | 515.61 |
| 2014/2/4 | 12.46 | 3.21 | 8.46  | 19.44  | 0.00 | 2014/2/19 | 91.91   | 2.99 | 8.70  | 430.22 |
| 2014/2/4 | 10.08 | 3.13 | 8.17  | 7.56   | 0.00 | 2014/2/19 | -12.16  | 3.03 | 8.39  | 276.65 |
| 2014/2/4 | 3.36  | 3.16 | 7.63  | 1.15   | 0.00 | 2014/2/19 | -34.16  | 2.83 | 7.26  | 46.05  |
| 2014/2/4 | 6.85  | 3.21 | 7.40  | 0.00   | 0.00 | 2014/2/19 | 24.64   | 2.81 | 6.04  | 0.20   |
| 2014/2/4 | -1.90 | 3.17 | 7.49  | 0.01   | 0.00 | 2014/2/19 | -5.37   | 2.84 | 3.85  | 0.00   |
| 2014/2/4 | -3.54 | 3.12 | 7.51  | 0.00   | 0.00 | 2014/2/19 | -8.47   | 2.96 | 2.16  | 0.00   |
| 2014/2/4 | 1.61  | 2.92 | 7.46  | 0.00   | 0.00 | 2014/2/19 | -14.41  | 3.04 | 1.20  | 0.00   |
| 2014/2/4 | 1.12  | 2.88 | 7.17  | 0.00   | 0.00 | 2014/2/19 | -28.40  | 3.05 | 0.15  | 0.00   |
| 2014/2/4 | -0.74 | 2.85 | 6.87  | 0.00   | 0.00 | 2014/2/19 | -22.28  | 3.05 | -0.45 | 0.00   |
| 2014/2/5 | 0.10  | 2.88 | 6.78  | 0.00   | 0.00 | 2014/2/20 | 26.11   | 3.02 | -1.48 | 0.00   |
| 2014/2/5 | -1.20 | 2.94 | 6.77  | 0.00   | 0.00 | 2014/2/20 | -36.43  | 3.22 | -1.54 | 0.00   |
| 2014/2/5 | -1.26 | 3.09 | 6.64  | 0.00   | 0.00 | 2014/2/20 | -23.47  | 3.15 | -1.50 | 0.00   |
| 2014/2/5 | 7.80  | 3.17 | 6.54  | 0.00   | 0.00 | 2014/2/20 | -39.40  | 3.30 | -1.53 | 0.00   |
| 2014/2/5 | 7.29  | 3.72 | 6.46  | 0.00   | 0.00 | 2014/2/20 | 44.91   | 3.37 | -1.49 | 0.00   |
| 2014/2/5 | 11.42 | 4.03 | 6.48  | 0.00   | 0.00 | 2014/2/20 | -2.09   | 3.68 | -1.46 | 0.00   |
| 2014/2/5 |       | 4.03 | 6.60  | 1.52   | 0.00 | 2014/2/20 | -3.28   | 4.02 | -1.43 | 1.35   |
| 2014/2/5 |       | 3.61 | 6.77  | 16.71  | 0.00 | 2014/2/20 | 36.32   | 4.19 | -1.36 | 24.90  |
| 2014/2/5 | 4.96  | 3.36 | 7.19  | 45.47  | 0.00 | 2014/2/20 | 21.34   | 4.38 | -1.28 | 76.77  |
| 2014/2/5 | -1.01 | 2.85 | 7.93  | 120.88 | 0.00 | 2014/2/20 | -51.01  | 4.88 | -0.59 | 148.32 |
| 2014/2/5 | 5.04  | 2.73 | 8.98  | 177.18 | 0.00 | 2014/2/20 | -61.37  | 5.37 | 1.04  | 243.44 |
| 2014/2/5 | 40.33 | 2.81 | 9.76  | 246.58 | 0.00 | 2014/2/20 | -130.35 | 5.84 | 3.17  | 591.60 |

|          |         |      |       |        |      |           |         |      |       |        |
|----------|---------|------|-------|--------|------|-----------|---------|------|-------|--------|
| 2014/2/5 | 31.45   | 3.22 | 10.73 | 435.59 | 0.00 | 2014/2/20 | -243.19 | 6.28 | 6.31  | 857.27 |
| 2014/2/5 | -3.16   | 3.35 | 11.07 | 468.18 | 0.00 | 2014/2/20 | 187.70  | 4.78 | 9.27  | 769.72 |
| 2014/2/5 | -1.93   | 3.30 | 11.08 | 264.74 | 0.00 | 2014/2/20 | 237.64  | 4.62 | 11.68 | 559.72 |
| 2014/2/5 | 5.81    | 3.39 | 10.91 | 149.14 | 0.00 | 2014/2/20 | 223.60  | 4.75 | 12.72 | 530.30 |
| 2014/2/5 | 0.35    | 3.50 | 10.35 | 60.72  | 0.00 | 2014/2/20 | 65.99   | 4.63 | 13.27 | 273.28 |
| 2014/2/5 | 0.88    | 3.45 | 9.41  | 6.08   | 0.00 | 2014/2/20 | -1.30   | 3.93 | 12.92 | 47.03  |
| 2014/2/5 | -2.84   | 3.55 | 9.01  | 0.00   | 0.00 | 2014/2/20 | -14.90  | 3.63 | 10.14 | 0.44   |
| 2014/2/5 | 12.19   | 4.36 | 8.73  | 0.00   | 0.00 | 2014/2/20 | 10.52   | 3.45 | 7.42  | 0.00   |
| 2014/2/5 | 3.32    | 4.23 | 8.50  | 0.00   | 0.00 | 2014/2/20 | 10.37   | 3.51 | 5.74  | 0.00   |
| 2014/2/5 | -3.51   | 3.79 | 8.16  | 0.00   | 0.00 | 2014/2/20 | 0.10    | 3.44 | 4.77  | 0.00   |
| 2014/2/5 | -4.02   | 3.61 | 7.74  | 0.00   | 0.00 | 2014/2/20 | 7.24    | 3.44 | 4.47  | 0.00   |
| 2014/5/5 |         | 6.30 | 18.48 | 0.00   | 0.00 | 2014/5/12 | 38.76   | 4.56 | 15.28 | 0.00   |
| 2014/5/5 | 1.18    | 6.54 | 18.46 | 0.00   | 0.00 | 2014/5/12 | -30.58  | 4.71 | 15.18 | 0.00   |
| 2014/5/5 | 46.39   | 7.42 | 18.22 | 0.00   | 0.05 | 2014/5/12 | -37.75  | 4.62 | 15.02 | 1.69   |
| 2014/5/5 | -0.30   | 6.40 | 17.77 | 0.00   | 0.05 | 2014/5/12 | 36.05   | 4.44 | 14.96 | 0.00   |
| 2014/5/5 | 3.93    | 6.26 | 17.39 | 0.00   | 0.00 | 2014/5/12 | -3.05   | 4.34 | 15.02 | 0.00   |
| 2014/5/5 | -4.12   | 5.49 | 16.95 | 0.00   | 0.05 | 2014/5/12 | -0.76   | 4.58 | 15.06 | 4.07   |
| 2014/5/5 | -9.14   | 5.07 | 16.70 | 2.11   | 0.05 | 2014/5/12 | 10.54   | 4.90 | 15.06 | 0.00   |
| 2014/5/5 | -23.01  | 5.06 | 16.65 | 15.30  | 0.00 | 2014/5/12 | -50.02  | 5.04 | 15.16 | 44.98  |
| 2014/5/5 | -33.16  | 5.13 | 16.65 | 34.19  | 0.00 | 2014/5/12 | -51.73  | 5.37 | 15.88 | 125.45 |
| 2014/5/5 | -29.33  | 5.06 | 16.62 | 41.84  | 0.05 | 2014/5/12 | -88.90  | 5.57 | 16.47 | 184.68 |
| 2014/5/5 | -41.23  | 5.20 | 16.68 | 82.94  | 0.05 | 2014/5/12 | -92.03  | 5.61 | 17.23 | 189.29 |
| 2014/5/5 | -107.15 | 5.39 | 17.19 | 293.12 | 0.00 | 2014/5/12 | -40.13  | 5.62 | 18.71 | 342.92 |
| 2014/5/5 | -45.37  | 5.13 | 17.13 | 126.92 | 0.00 | 2014/5/12 | 14.63   | 5.91 | 20.30 | 737.18 |
| 2014/5/5 | -10.95  | 4.97 | 17.07 | 101.55 | 0.00 | 2014/5/12 | 132.71  | 6.20 | 22.26 | 938.08 |
| 2014/5/5 | -37.62  | 5.07 | 17.24 | 116.05 | 0.00 | 2014/5/12 | 223.53  | 7.50 | 23.93 | 833.72 |
| 2014/5/5 | -59.89  | 4.94 | 17.59 | 69.10  | 0.00 | 2014/5/12 | 251.59  | 7.46 | 24.99 | 715.51 |
| 2014/5/5 | -62.78  | 5.07 | 17.98 | 144.69 | 0.00 | 2014/5/12 | 232.21  | 7.14 | 25.47 | 290.55 |
| 2014/5/5 | -29.52  | 4.73 | 18.14 | 31.83  | 0.00 | 2014/5/12 | 193.75  | 6.96 | 25.59 | 214.35 |
| 2014/5/5 | -19.87  | 4.46 | 17.93 | 26.54  | 0.00 | 2014/5/12 | 164.85  | 6.93 | 25.27 | 101.01 |
| 2014/5/5 | -18.84  | 4.31 | 17.30 | 2.66   | 0.00 | 2014/5/12 | 66.93   | 6.87 | 24.27 | 25.15  |
| 2014/5/5 | -47.19  |      | 16.69 | 0.00   | 0.00 | 2014/5/12 | 17.76   | 6.49 | 22.58 | 0.00   |
| 2014/5/5 |         | 4.28 | 16.36 | 0.00   | 0.00 | 2014/5/12 | 11.22   | 6.55 | 21.93 | 0.00   |
| 2014/5/5 |         | 3.91 | 15.66 | 0.00   | 0.00 | 2014/5/12 | 11.69   | 6.75 | 21.05 | 0.00   |

|          |         |      |       |        |      |           |         |       |       |        |
|----------|---------|------|-------|--------|------|-----------|---------|-------|-------|--------|
| 2014/5/5 |         | 3.80 | 15.54 | 0.00   | 0.00 | 2014/5/12 | 52.42   | 6.60  | 20.70 | 0.00   |
| 2014/5/6 |         | 3.68 | 15.79 | 0.00   | 0.00 | 2014/5/13 | 54.67   | 6.42  | 20.35 | 12.83  |
| 2014/5/6 |         | 3.65 | 15.65 | 0.00   | 0.00 | 2014/5/13 | 42.91   | 6.49  | 20.24 | 0.00   |
| 2014/5/6 |         | 3.54 | 15.46 | 0.00   | 0.00 | 2014/5/13 | 32.32   | 6.16  | 20.12 | 0.00   |
| 2014/5/6 | -0.08   | 3.62 | 15.67 | 0.00   | 0.00 | 2014/5/13 | 82.01   | 5.50  | 19.83 | 0.00   |
| 2014/5/6 | -0.48   | 3.77 | 15.69 | 0.00   | 0.00 | 2014/5/13 |         | 6.31  | 20.03 | 0.00   |
| 2014/5/6 |         | 4.00 | 15.75 | 0.01   | 0.00 | 2014/5/13 | 145.00  | 6.22  | 19.73 | 0.00   |
| 2014/5/6 | 0.00    | 4.01 | 15.51 | 16.21  | 0.00 | 2014/5/13 | 24.13   | 7.13  | 19.92 | 0.00   |
| 2014/5/6 |         | 4.35 | 15.95 | 74.73  | 0.00 | 2014/5/13 | -95.94  | 7.18  | 20.32 | 78.05  |
| 2014/5/6 | -12.73  | 4.63 | 16.57 | 181.26 | 0.00 | 2014/5/13 | 217.02  | 6.62  | 20.84 | 82.88  |
| 2014/5/6 | -122.60 | 5.04 | 18.22 | 504.24 | 0.00 | 2014/5/13 | 165.21  | 6.98  | 21.74 | 214.22 |
| 2014/5/6 | -65.41  | 5.40 | 18.85 | 238.04 | 0.00 | 2014/5/13 | -33.71  | 7.53  | 23.37 | 610.03 |
| 2014/5/6 | -55.78  | 5.07 | 19.46 | 298.84 | 0.00 | 2014/5/13 | -67.21  | 7.15  | 25.41 | 648.43 |
| 2014/5/6 | -47.31  | 5.00 | 20.54 | 539.34 | 0.00 | 2014/5/13 | 7.55    | 6.60  | 26.97 | 751.83 |
| 2014/5/6 | -36.07  | 4.58 | 21.53 | 618.17 | 0.00 | 2014/5/13 | 2.17    | 5.44  | 27.59 | 645.78 |
| 2014/5/6 | -27.19  | 4.28 | 22.20 | 583.20 | 0.00 | 2014/5/13 | 33.09   | 5.08  | 29.25 | 868.13 |
| 2014/5/6 | -36.72  | 4.15 | 22.38 | 467.23 | 0.00 | 2014/5/13 | 71.06   | 4.95  | 28.70 | 507.88 |
| 2014/5/6 | 68.97   | 3.83 | 22.68 | 419.28 | 0.00 | 2014/5/13 | 77.91   | 4.96  | 29.53 | 553.25 |
| 2014/5/6 | 65.61   | 3.65 | 22.11 | 176.31 | 0.00 | 2014/5/13 | 198.16  | 4.51  | 29.19 | 382.63 |
| 2014/5/6 | 65.55   | 3.76 | 21.13 | 35.66  | 0.00 | 2014/5/13 | 24.84   | 6.49  | 26.70 | 79.02  |
| 2014/5/6 | 74.09   | 3.72 | 20.18 | 1.86   | 0.00 | 2014/5/13 | -0.79   | 7.46  | 25.13 | 9.57   |
| 2014/5/6 | 71.44   | 3.62 | 19.20 | 0.00   | 0.00 | 2014/5/13 | -38.33  | 7.98  | 23.70 | 0.00   |
| 2014/5/6 | 35.24   | 3.65 | 18.44 | 0.00   | 0.00 | 2014/5/13 | -40.25  | 8.45  | 22.51 | 7.62   |
| 2014/5/6 | 90.07   | 3.64 | 17.81 | 0.00   | 0.00 | 2014/5/13 | -36.27  | 9.05  | 21.68 | 0.00   |
| 2014/5/6 | 74.45   | 3.59 | 17.90 | 0.00   | 0.00 | 2014/5/13 | -86.43  | 9.51  | 21.45 | 0.00   |
| 2014/5/7 | 39.86   | 3.46 | 18.05 | 0.00   | 0.00 | 2014/5/14 | -110.33 | 10.07 | 20.95 | 12.66  |
| 2014/5/7 | 47.64   | 3.33 | 17.39 | 0.00   | 0.00 | 2014/5/14 | -105.45 | 12.47 | 20.59 | 0.00   |
| 2014/5/7 | 16.90   | 3.24 | 17.05 | 0.00   | 0.00 | 2014/5/14 | -169.87 | 15.76 | 20.41 | 0.00   |
| 2014/5/7 |         | 3.28 | 16.64 | 0.00   | 0.00 | 2014/5/14 | -17.07  | 17.56 | 20.32 | 0.00   |
| 2014/5/7 |         | 3.26 | 16.10 | 0.00   | 0.00 | 2014/5/14 | -45.93  | 17.32 | 20.10 | 0.00   |
| 2014/5/7 | 0.00    | 4.07 | 16.07 | 0.01   | 0.00 | 2014/5/14 | -236.42 | 19.85 | 20.08 | 0.00   |
| 2014/5/7 |         | 3.80 | 15.83 | 2.87   | 0.00 | 2014/5/14 | -168.15 | 22.62 | 19.85 | 0.00   |
| 2014/5/7 |         | 4.30 | 16.37 | 39.17  | 0.00 | 2014/5/14 | -49.46  | 14.52 | 19.75 | 48.66  |
| 2014/5/7 | 35.36   | 4.59 | 17.22 | 63.92  | 0.00 | 2014/5/14 | -161.14 | 15.40 | 20.04 | 75.88  |

|          |        |      |       |        |      |           |         |       |       |        |
|----------|--------|------|-------|--------|------|-----------|---------|-------|-------|--------|
| 2014/5/7 | 10.25  | 5.63 | 18.13 | 197.98 | 0.00 | 2014/5/14 | -213.94 | 20.82 | 20.24 | 133.73 |
| 2014/5/7 | 68.23  | 5.88 | 19.37 | 302.03 | 0.00 | 2014/5/14 | -27.65  | 22.94 | 20.65 | 143.98 |
| 2014/5/7 | 85.81  | 4.82 | 20.05 | 248.78 | 0.00 | 2014/5/14 | 132.47  | 17.89 | 20.38 | 131.40 |
| 2014/5/7 | 113.78 | 4.24 | 20.00 | 259.55 | 0.00 | 2014/5/14 | -78.48  | 17.82 | 20.69 | 190.62 |
| 2014/5/7 | 112.66 | 4.15 | 20.79 | 375.46 | 0.00 | 2014/5/14 | -199.49 | 20.75 | 20.81 | 162.23 |
| 2014/5/7 | 92.89  | 4.09 | 20.15 | 142.48 | 0.00 | 2014/5/14 | -286.40 | 20.40 | 20.58 | 217.00 |
| 2014/5/7 | 112.63 | 4.90 | 19.73 | 85.79  | 0.00 | 2014/5/14 | 5.59    |       | 20.98 | 189.10 |
| 2014/5/7 | 121.11 | 5.00 | 18.92 | 60.63  | 0.05 | 2014/5/14 | 103.87  | 22.05 | 20.43 | 73.14  |
| 2014/5/7 | -54.90 | 5.55 | 17.95 | 35.37  | 0.10 | 2014/5/14 | 44.44   | 13.62 | 20.05 | 61.91  |
| 2014/5/7 | -39.14 | 5.93 | 17.44 | 21.49  | 0.00 | 2014/5/14 | 50.81   | 9.43  | 19.88 | 37.81  |
| 2014/5/7 | -20.30 | 5.19 | 16.75 | 0.57   | 0.05 | 2014/5/14 | 63.93   | 8.52  | 19.47 | 11.73  |
| 2014/5/7 |        | 4.61 | 15.95 | 0.00   | 0.00 | 2014/5/14 | -10.50  | 7.95  | 19.09 | 0.00   |
| 2014/5/7 | -16.19 | 4.84 | 15.78 | 0.00   | 0.00 | 2014/5/14 | 48.62   | 6.94  | 18.80 | 0.00   |
| 2014/5/7 | -28.81 | 4.49 | 15.61 | 0.00   | 0.00 | 2014/5/14 | 22.44   | 6.23  | 18.60 | 0.00   |
| 2014/5/7 | -20.17 | 4.18 | 15.75 | 0.00   | 0.00 | 2014/5/14 | 60.16   | 5.58  | 18.40 | 0.00   |
| 2014/5/8 | -0.87  | 2.88 | 15.40 | 0.00   | 0.00 | 2014/5/15 | 15.60   | 5.19  | 18.32 | 0.00   |
| 2014/5/8 | -3.29  | 2.32 | 14.82 | 0.00   | 0.00 | 2014/5/15 | 19.05   | 5.58  | 17.78 | 0.00   |
| 2014/5/8 | -5.47  | 2.24 | 14.79 | 0.00   | 0.00 | 2014/5/15 | 29.31   | 5.45  | 17.94 | 0.00   |
| 2014/5/8 | -5.08  | 2.24 | 14.72 | 0.00   | 0.00 | 2014/5/15 | 50.62   | 4.92  | 17.72 | 0.00   |
| 2014/5/8 | -8.37  | 2.26 | 14.67 | 0.00   | 0.00 | 2014/5/15 | 37.12   | 4.87  | 17.49 | 0.00   |
| 2014/5/8 | -4.07  | 2.18 | 14.66 | 0.00   | 0.00 | 2014/5/15 | 2.59    | 4.97  | 17.40 | 0.00   |
| 2014/5/8 | -7.86  | 2.27 | 14.74 | 4.17   | 0.00 | 2014/5/15 | 25.65   | 4.95  | 17.07 | 14.44  |
| 2014/5/8 | -18.43 | 2.50 | 14.85 | 29.83  | 0.00 | 2014/5/15 | 39.52   | 4.82  | 17.59 | 85.85  |
| 2014/5/8 |        | 2.74 | 15.58 | 68.56  | 0.00 | 2014/5/15 | -29.80  | 5.12  | 17.72 | 68.53  |
| 2014/5/8 | -31.54 | 2.82 | 16.20 | 102.44 | 0.00 | 2014/5/15 | 29.99   | 4.93  | 17.81 | 68.44  |
| 2014/5/8 | 24.49  | 2.90 | 16.89 | 143.78 | 0.00 | 2014/5/15 | 68.49   | 4.86  | 17.55 | 130.96 |
| 2014/5/8 | 106.66 | 3.01 | 17.60 | 202.29 | 0.00 | 2014/5/15 | 94.24   | 4.91  | 16.89 | 214.35 |
| 2014/5/8 | 1.14   | 3.28 | 18.58 | 349.63 | 0.00 | 2014/5/15 | 58.30   | 5.04  | 16.78 | 354.65 |
| 2014/5/8 | -55.46 | 3.52 | 20.39 | 608.20 | 0.00 | 2014/5/15 | 125.87  | 4.81  | 17.57 | 455.53 |
| 2014/5/8 | -11.64 | 3.23 | 21.79 | 674.19 | 0.00 | 2014/5/15 | 40.22   | 4.79  | 18.78 | 637.50 |
| 2014/5/8 | 32.77  | 2.94 | 22.75 | 601.34 | 0.00 | 2014/5/15 | 27.66   | 4.81  | 19.98 | 819.98 |
| 2014/5/8 | -40.50 | 2.99 | 23.09 | 456.47 | 0.00 | 2014/5/15 | -15.69  | 5.16  | 20.86 | 537.28 |
| 2014/5/8 | -59.96 | 2.88 | 22.87 | 259.14 | 0.00 | 2014/5/15 | 3.46    | 5.18  | 20.75 | 269.33 |
| 2014/5/8 | 3.89   | 2.72 | 21.95 | 83.15  | 0.00 | 2014/5/15 | 3.00    | 5.24  | 20.65 | 121.53 |

|           |        |      |       |        |      |           |         |      |       |        |
|-----------|--------|------|-------|--------|------|-----------|---------|------|-------|--------|
| 2014/5/8  | -16.32 | 2.68 | 19.65 | 2.96   | 0.00 | 2014/5/15 | 26.98   | 4.94 | 20.03 | 17.07  |
| 2014/5/8  | -19.05 | 2.75 | 18.07 | 0.00   | 0.00 | 2014/5/15 | 7.30    | 4.86 | 19.21 | 0.00   |
| 2014/5/8  | -36.48 |      | 17.71 | 0.00   | 0.00 | 2014/5/15 | -35.68  | 4.94 | 18.71 | 0.00   |
| 2014/5/8  | -47.61 |      | 17.71 | 0.00   | 0.00 | 2014/5/15 | 9.76    | 4.95 | 18.20 | 0.00   |
| 2014/5/8  | -35.26 | 2.86 | 17.47 | 0.00   | 0.00 | 2014/5/15 | -27.42  | 5.28 | 17.98 | 0.00   |
| 2014/5/9  | -12.05 | 2.84 | 16.53 | 0.00   | 0.00 | 2014/5/16 | -2.14   | 5.26 | 17.78 | 0.00   |
| 2014/5/9  | -9.67  | 2.87 | 15.62 | 0.00   | 0.00 | 2014/5/16 | -18.93  | 5.28 | 17.61 | 0.00   |
| 2014/5/9  |        | 2.85 | 14.49 | 0.00   | 0.00 | 2014/5/16 | 17.30   | 5.14 | 17.33 | 0.00   |
| 2014/5/9  |        | 2.78 | 14.25 | 0.00   | 0.00 | 2014/5/16 | -52.65  | 5.11 | 17.05 | 0.00   |
| 2014/5/9  | 6.63   | 2.55 | 13.86 | 0.00   | 0.00 | 2014/5/16 | -0.38   | 4.91 | 16.91 | 18.22  |
| 2014/5/9  | 0.00   | 2.58 | 13.15 | 0.03   | 0.00 | 2014/5/16 |         |      | 16.74 | 0.00   |
| 2014/5/9  | -2.79  | 2.54 | 12.67 | 30.14  | 0.00 | 2014/5/16 | 13.44   | 5.10 | 16.69 | 0.00   |
| 2014/5/9  | -3.56  | 2.62 | 13.59 | 155.48 | 0.00 | 2014/5/16 | -1.31   | 5.18 | 16.78 | 2.79   |
| 2014/5/9  | -5.26  | 2.70 | 16.11 | 366.51 | 0.00 | 2014/5/16 | 43.29   | 5.21 | 17.17 | 63.56  |
| 2014/5/9  | 10.92  | 2.85 | 19.30 | 599.37 | 0.00 | 2014/5/16 | 26.57   | 5.44 | 17.69 | 112.18 |
| 2014/5/9  | 5.69   | 2.90 | 21.53 | 751.58 | 0.00 | 2014/5/16 | 13.53   | 6.82 | 17.80 | 92.15  |
| 2014/5/9  | 21.56  | 3.05 | 23.35 | 878.67 | 0.00 | 2014/5/16 | -13.21  | 6.42 | 18.04 | 370.22 |
| 2014/5/9  | 33.04  | 3.03 | 24.80 | 930.75 | 0.00 | 2014/5/16 | 47.78   | 6.32 | 19.10 | 490.82 |
| 2014/5/9  | 72.46  | 3.00 | 25.70 | 909.75 | 0.00 | 2014/5/16 | 40.85   | 6.49 | 19.58 | 369.33 |
| 2014/5/9  | 134.32 | 3.10 | 26.91 | 826.73 | 0.00 | 2014/5/16 | -49.57  | 6.97 | 19.68 | 205.62 |
| 2014/5/9  | 6.21   | 3.15 | 27.44 | 681.40 | 0.00 | 2014/5/16 | 33.80   | 7.36 | 19.68 | 197.32 |
| 2014/5/9  | 34.14  | 3.12 | 27.48 | 493.02 | 0.00 | 2014/5/16 | 8.58    | 7.23 | 19.59 | 103.45 |
| 2014/5/9  | -21.58 | 2.97 | 27.16 | 297.88 | 0.00 | 2014/5/16 | 41.81   | 7.01 | 19.66 | 99.04  |
| 2014/5/9  | -21.30 | 3.00 | 25.69 | 105.47 | 0.00 | 2014/5/16 | 47.31   | 6.66 | 19.25 | 39.17  |
| 2014/5/9  | -44.24 | 3.07 | 23.39 | 5.37   | 0.00 | 2014/5/16 | 6.70    | 6.60 | 18.97 | 2.08   |
| 2014/5/9  | -18.54 | 3.20 | 20.69 | 0.00   | 0.00 | 2014/5/16 | 13.82   | 6.93 | 18.19 | 0.00   |
| 2014/5/9  | -16.92 | 2.89 | 18.49 | 0.00   | 0.00 | 2014/5/16 | -15.97  | 6.67 | 17.58 | 0.00   |
| 2014/5/9  | -20.80 | 2.76 | 17.98 | 0.00   | 0.00 | 2014/5/16 | -39.87  | 6.62 | 17.41 | 0.00   |
| 2014/5/9  | -5.48  | 2.76 | 17.34 | 0.00   | 0.00 | 2014/5/16 | 14.10   | 6.27 | 17.51 | 0.00   |
| 2014/8/15 | -25.87 | 4.23 | 24.22 | 0.00   | 0.05 | 2014/8/21 | -127.42 | 3.27 | 19.90 | 0.00   |
| 2014/8/16 | -13.57 | 3.83 | 24.10 | 0.00   | 0.00 | 2014/8/21 | -13.47  | 3.12 | 19.38 | 0.00   |
| 2014/8/16 | -3.43  | 3.71 | 23.89 | 0.00   | 0.00 | 2014/8/21 | -1.60   | 3.04 | 19.06 | 0.00   |
| 2014/8/16 | -5.81  | 3.86 | 24.03 | 0.00   | 0.00 | 2014/8/21 | -14.76  | 3.20 | 18.59 | 0.00   |
| 2014/8/16 | -24.43 | 4.02 | 24.01 | 0.00   | 0.00 | 2014/8/21 |         | 2.96 | 18.28 | 0.00   |

|           |        |      |       |        |      |           |         |      |       |        |
|-----------|--------|------|-------|--------|------|-----------|---------|------|-------|--------|
| 2014/8/16 | 29.21  | 3.87 | 23.94 | 0.00   | 0.00 | 2014/8/21 | -35.58  | 2.54 | 18.01 | 0.06   |
| 2014/8/16 | 1.26   | 3.85 | 23.81 | 7.20   | 0.00 | 2014/8/21 | -32.20  | 2.88 | 18.09 | 1.22   |
| 2014/8/16 | -34.06 | 3.99 | 24.16 | 48.25  | 0.00 | 2014/8/21 | -5.31   | 2.99 | 18.11 | 32.14  |
| 2014/8/16 | 0.71   | 4.20 | 24.62 | 131.82 | 0.00 | 2014/8/21 | -20.11  | 3.18 | 18.50 | 136.51 |
| 2014/8/16 | 5.25   | 3.86 | 25.58 | 504.53 | 0.00 | 2014/8/21 | -5.72   | 2.86 | 19.37 | 312.46 |
| 2014/8/16 | 28.24  | 3.56 | 27.80 | 543.73 | 0.00 | 2014/8/21 | 91.78   | 3.43 | 22.15 | 651.52 |
| 2014/8/16 | 40.95  | 3.33 | 28.84 | 515.80 | 0.00 | 2014/8/21 | 147.59  | 4.98 | 25.33 | 810.08 |
| 2014/8/16 | 77.58  | 3.19 | 29.73 | 626.49 | 0.00 | 2014/8/21 | 294.60  | 6.05 | 27.30 | 866.81 |
| 2014/8/16 | 65.18  | 3.23 | 30.52 | 724.06 | 0.00 | 2014/8/21 | 329.60  | 6.71 | 29.04 | 907.80 |
| 2014/8/16 | 56.69  | 3.16 | 30.00 | 324.54 | 0.00 | 2014/8/21 | 204.09  | 6.40 | 29.73 | 575.82 |
| 2014/8/16 | 49.88  | 3.17 | 30.38 | 365.00 | 0.00 | 2014/8/21 | 236.02  | 6.22 | 30.32 | 562.10 |
| 2014/8/16 | 37.74  | 3.31 | 29.33 | 417.25 | 0.00 | 2014/8/21 | 216.22  | 6.34 | 30.41 | 449.97 |
| 2014/8/16 | -13.70 | 3.02 | 28.82 | 165.83 | 0.00 | 2014/8/21 | 54.40   | 6.03 | 30.52 | 352.73 |
| 2014/8/16 | 17.86  | 2.72 | 27.60 | 98.91  | 0.00 | 2014/8/21 | -14.15  | 5.87 | 30.31 | 155.50 |
| 2014/8/16 | 9.85   | 2.67 | 26.41 | 3.54   | 0.00 | 2014/8/21 | -13.31  | 5.66 | 27.57 | 17.14  |
| 2014/8/16 | 13.30  | 2.85 | 25.88 | 0.00   | 0.10 | 2014/8/21 | 14.57   | 5.63 | 24.83 | 0.00   |
| 2014/8/16 | 8.00   | 3.08 | 25.18 | 0.00   | 0.00 | 2014/8/21 | 40.30   | 5.42 | 23.45 | 0.00   |
| 2014/8/16 | 7.64   | 3.31 | 24.66 | 0.00   | 1.55 | 2014/8/21 | 4.69    | 5.23 | 22.55 | 0.01   |
| 2014/8/16 | 22.43  | 3.25 | 24.10 | 0.00   | 0.30 | 2014/8/21 | -12.12  | 5.19 | 22.00 | 0.00   |
| 2014/8/16 | 11.63  | 3.30 | 24.04 | 0.00   | 0.65 | 2014/8/22 | -23.29  | 4.74 | 21.49 | 0.00   |
| 2014/8/17 | 8.27   | 3.37 | 23.84 | 0.00   | 0.00 | 2014/8/22 | -12.52  | 4.37 | 21.02 | 0.00   |
| 2014/8/17 | 5.76   | 3.32 | 23.70 | 0.00   | 0.00 | 2014/8/22 |         | 3.95 | 20.72 | 0.05   |
| 2014/8/17 | 1.60   | 3.32 | 23.62 | 0.00   | 0.00 | 2014/8/22 | -103.60 | 3.80 | 20.30 | 0.00   |
| 2014/8/17 | 1.09   | 3.36 | 23.56 | 0.00   | 0.00 | 2014/8/22 | -72.94  | 3.68 | 20.23 | 0.03   |
| 2014/8/17 | -1.50  | 3.38 | 23.45 | 0.00   | 0.00 | 2014/8/22 | 23.84   | 3.81 | 20.13 | 0.00   |
| 2014/8/17 | -0.87  | 3.35 | 23.49 | 11.36  | 0.00 | 2014/8/22 | -63.77  | 3.39 | 20.01 | 1.13   |
| 2014/8/17 | 3.60   | 3.38 | 23.84 | 84.99  | 0.00 | 2014/8/22 | -17.36  | 3.71 | 20.00 | 47.44  |
| 2014/8/17 | 26.35  | 3.50 | 24.23 | 180.43 | 0.00 | 2014/8/22 | -30.88  | 3.85 | 20.43 | 138.05 |
| 2014/8/17 | 20.49  | 3.70 | 24.85 | 426.02 | 0.00 | 2014/8/22 | -24.53  | 5.36 | 22.54 | 429.00 |
| 2014/8/17 | 49.26  | 3.73 | 26.43 | 478.78 | 0.00 | 2014/8/22 | -82.94  | 4.98 | 26.09 | 634.59 |
| 2014/8/17 | 89.28  | 3.73 | 28.24 | 682.08 | 0.00 | 2014/8/22 | 67.06   | 4.37 | 28.85 | 686.18 |
| 2014/8/17 | 108.87 | 3.49 | 29.75 | 643.93 | 0.00 | 2014/8/22 | 179.96  | 4.06 | 30.38 | 755.66 |
| 2014/8/17 | 107.32 | 3.35 | 29.97 | 378.22 | 0.00 | 2014/8/22 | 276.53  | 3.96 | 30.95 | 794.05 |
| 2014/8/17 | 111.82 | 3.65 | 30.55 | 416.91 | 0.00 | 2014/8/22 | 250.06  | 3.84 | 31.68 | 707.26 |

|           |        |      |       |        |      |           |        |      |       |        |
|-----------|--------|------|-------|--------|------|-----------|--------|------|-------|--------|
| 2014/8/17 | 58.79  | 3.68 | 30.59 | 289.64 | 0.00 | 2014/8/22 | 145.28 | 3.89 | 31.87 | 638.57 |
| 2014/8/17 | 58.57  | 3.70 | 29.83 | 132.37 | 0.00 | 2014/8/22 | 170.57 | 3.76 | 32.13 | 471.21 |
| 2014/8/17 | 88.51  | 4.47 | 28.46 | 47.58  | 0.00 | 2014/8/22 | 49.99  | 3.80 | 31.63 | 283.21 |
| 2014/8/17 | 7.09   | 7.28 | 25.88 | 10.39  | 5.85 | 2014/8/22 | -25.25 | 3.79 | 30.86 | 149.06 |
| 2014/8/17 | 50.82  | 6.91 | 25.45 | 1.65   | 0.15 | 2014/8/22 | -11.70 | 3.82 | 29.06 | 18.34  |
| 2014/8/17 | 51.51  | 6.06 | 25.27 | 0.00   | 0.00 | 2014/8/22 | -34.04 | 3.78 | 27.54 | 0.00   |
| 2014/8/17 | 45.50  | 5.68 | 25.16 | 0.00   | 0.00 | 2014/8/22 | -31.15 | 3.92 | 26.27 | 0.00   |
| 2014/8/17 | 23.67  | 5.66 | 25.07 | 0.00   | 0.00 | 2014/8/22 | 9.98   | 4.07 | 24.33 | 0.00   |
| 2014/8/17 | -20.23 | 5.77 | 24.97 | 0.00   | 0.00 | 2014/8/22 | -0.91  | 3.93 | 24.07 | 0.02   |
| 2014/8/17 | -8.42  | 6.05 | 24.82 | 0.00   | 0.00 | 2014/8/23 | -7.42  | 3.95 | 23.24 | 0.00   |
| 2014/8/18 | 13.49  | 6.10 | 24.94 | 0.00   | 0.00 | 2014/8/23 | -11.91 | 3.73 | 22.54 | 0.00   |
| 2014/8/18 | -0.57  | 6.43 | 25.00 | 0.00   | 0.55 | 2014/8/23 | -13.76 | 3.70 | 22.24 | 0.00   |
| 2014/8/18 | -9.67  |      | 24.77 | 0.00   | 0.00 | 2014/8/23 | 11.87  | 3.39 | 21.77 | 0.03   |
| 2014/8/18 | 23.12  | 5.11 | 24.37 | 0.00   | 0.60 | 2014/8/23 | -21.32 | 3.04 | 21.79 | 0.01   |
| 2014/8/18 | 11.72  | 4.49 | 23.80 | 0.00   | 2.50 | 2014/8/23 | 8.80   | 2.70 | 21.52 | 0.06   |
| 2014/8/18 | 25.49  | 4.36 | 23.69 | 0.98   | 0.25 | 2014/8/23 | 3.99   | 2.75 | 21.60 | 1.25   |
| 2014/8/18 | 25.85  | 4.50 | 23.78 | 22.94  | 0.05 | 2014/8/23 | 14.24  | 2.74 | 21.74 | 59.93  |
| 2014/8/18 | 38.56  | 4.40 | 24.11 | 43.29  | 0.00 | 2014/8/23 | 14.49  | 3.04 | 23.82 | 235.02 |
| 2014/8/18 | -8.99  | 5.38 | 24.32 | 69.51  | 0.00 | 2014/8/23 | 3.02   | 3.57 | 26.68 | 430.42 |
| 2014/8/18 | 24.28  | 4.74 | 24.23 | 103.45 | 0.00 | 2014/8/23 | 72.81  | 3.62 | 29.17 | 632.56 |
| 2014/8/18 | 29.68  | 4.42 | 24.38 | 135.64 | 0.00 | 2014/8/23 | 104.15 | 3.19 | 30.51 | 701.93 |
| 2014/8/18 | 26.43  | 4.77 | 24.50 | 101.97 | 0.00 | 2014/8/23 | 88.04  | 2.83 | 30.18 | 396.09 |
| 2014/8/18 | 36.76  | 4.29 | 24.78 | 126.60 | 0.00 | 2014/8/23 | 146.89 | 2.68 | 30.79 | 512.14 |
| 2014/8/18 | 20.54  | 4.06 | 24.81 | 70.08  | 0.00 | 2014/8/23 | 58.39  | 2.59 | 31.30 | 561.73 |
| 2014/8/18 | 30.07  | 3.96 | 24.74 | 55.04  | 0.00 | 2014/8/23 | 47.89  | 2.47 | 31.77 | 553.52 |
| 2014/8/18 | 25.52  | 3.91 | 24.63 | 39.44  | 0.00 | 2014/8/23 | 17.94  | 2.35 | 31.34 | 492.80 |
| 2014/8/18 | -8.87  | 4.66 | 24.42 | 33.25  | 0.00 | 2014/8/23 | 2.93   | 2.35 | 31.00 | 245.83 |
| 2014/8/18 | 25.22  | 4.47 | 23.96 | 6.84   | 0.00 | 2014/8/23 | -6.65  | 2.30 | 30.43 | 166.36 |
| 2014/8/18 | 23.62  | 4.25 | 22.92 | 0.17   | 0.10 | 2014/8/23 | 7.62   | 2.30 | 29.00 | 17.47  |
| 2014/8/18 | 17.56  | 4.02 | 22.59 | 0.00   | 0.10 | 2014/8/23 | -23.00 | 2.34 | 27.79 | 0.00   |
| 2014/8/18 | 14.34  | 3.98 | 22.50 | 0.00   | 0.00 | 2014/8/23 | -14.39 | 2.29 | 26.85 | 0.06   |
| 2014/8/18 | 10.71  | 4.29 | 22.25 | 0.00   | 0.00 | 2014/8/23 | -28.31 | 2.89 | 26.54 | 0.05   |
| 2014/8/18 | 18.41  | 3.68 | 21.88 | 0.00   | 0.00 | 2014/8/23 | -2.54  | 3.20 | 26.12 | 0.06   |
| 2014/8/18 | 7.70   | 3.54 | 21.74 | 0.00   | 0.00 | 2014/8/24 | 13.58  | 3.47 | 25.82 | 0.12   |

|           |       |      |       |        |      |           |         |       |       |        |
|-----------|-------|------|-------|--------|------|-----------|---------|-------|-------|--------|
| 2014/8/19 | 7.30  | 3.44 | 21.52 | 0.00   | 0.00 | 2014/8/24 | -24.49  | 3.65  | 25.32 | 0.05   |
| 2014/8/19 | 8.96  | 3.62 | 21.32 | 0.00   | 0.15 | 2014/8/24 | -23.66  | 3.55  | 24.77 | 0.00   |
| 2014/8/19 | 9.27  | 3.98 | 21.22 | 0.00   | 0.20 | 2014/8/24 | 2.18    | 3.98  | 24.71 | 0.02   |
| 2014/8/19 | 4.42  | 4.36 | 21.22 | 0.00   | 0.10 | 2014/8/24 | 28.18   | 4.03  | 24.10 | 0.54   |
| 2014/8/19 | 2.54  | 4.60 | 21.21 | 0.00   | 0.40 | 2014/8/24 | -0.66   | 4.43  | 23.85 | 0.36   |
| 2014/8/19 | 25.59 | 4.50 | 21.37 | 2.25   | 0.25 | 2014/8/24 | 1.33    | 4.85  | 23.67 | 0.52   |
| 2014/8/19 | 21.05 | 4.32 | 21.59 | 22.47  | 0.35 | 2014/8/24 | 8.04    | 4.58  | 23.45 | 14.97  |
| 2014/8/19 | 36.82 | 3.85 | 21.68 | 30.01  | 0.05 | 2014/8/24 | -18.17  | 4.50  | 23.61 | 50.06  |
| 2014/8/19 | 5.09  | 3.99 | 22.01 | 83.10  | 0.10 | 2014/8/24 | -22.59  | 4.44  | 24.34 | 124.71 |
| 2014/8/19 | 17.14 | 3.82 | 22.00 | 48.94  | 0.40 | 2014/8/24 | 19.65   | 4.43  | 25.40 | 210.59 |
| 2014/8/19 | 20.43 | 3.84 | 21.96 | 23.10  | 1.70 | 2014/8/24 | -36.57  | 4.57  | 25.91 | 242.57 |
| 2014/8/19 | 17.51 | 3.72 | 21.80 | 19.37  | 3.20 | 2014/8/24 | -35.53  | 4.48  | 25.49 | 175.81 |
| 2014/8/19 | 26.54 | 3.81 | 21.80 | 59.38  | 4.75 | 2014/8/24 | -55.54  | 4.77  | 26.20 | 325.72 |
| 2014/8/19 | 14.45 | 3.78 | 22.16 | 121.29 | 0.15 | 2014/8/24 |         | 10.12 | 26.01 | 412.87 |
| 2014/8/19 | 25.83 | 3.75 | 22.31 | 76.36  | 0.10 | 2014/8/24 | -16.49  | 9.34  | 26.85 | 557.65 |
| 2014/8/19 | 22.24 | 3.95 | 22.35 | 34.72  | 0.45 | 2014/8/24 | 28.53   | 7.90  | 27.39 | 309.22 |
| 2014/8/19 | 18.95 | 4.12 | 22.45 | 34.74  | 0.05 | 2014/8/24 | 68.59   | 6.28  | 27.28 | 120.03 |
| 2014/8/19 | 29.29 | 4.10 | 22.53 | 19.86  | 0.00 | 2014/8/24 | 112.66  | 8.43  | 26.62 | 124.46 |
| 2014/8/19 | 19.60 | 4.47 | 22.50 | 0.68   | 0.00 | 2014/8/24 | -5.22   | 21.06 | 26.16 | 25.20  |
| 2014/8/19 | 23.24 | 4.42 | 22.46 | 0.00   | 0.00 | 2014/8/24 | -57.54  | 21.21 | 24.81 | 0.00   |
| 2014/8/19 | 31.80 | 4.18 | 22.42 | 0.00   | 0.10 | 2014/8/24 | -13.92  | 19.48 | 23.58 | 0.03   |
| 2014/8/19 | 22.28 | 4.27 | 22.36 | 0.00   | 0.40 | 2014/8/24 | -289.36 | 19.96 | 23.41 | 0.01   |
| 2014/8/19 | 64.60 | 3.71 | 21.95 | 0.00   | 1.35 | 2014/8/24 | -229.99 | 20.52 | 23.14 | 0.00   |
| 2014/8/19 | 26.60 | 3.29 | 20.97 | 0.00   | 1.50 | 2014/8/25 | -126.02 | 18.25 | 22.92 | 0.00   |
| 2014/8/20 | 14.50 | 3.18 | 20.78 | 0.00   | 0.75 | 2014/8/25 | -288.96 | 17.84 | 22.76 | 0.01   |
| 2014/8/20 | 23.05 | 3.08 | 20.83 | 0.00   | 0.55 | 2014/8/25 | -85.16  | 15.61 | 22.76 | 0.00   |
| 2014/8/20 | 36.48 | 3.00 | 20.84 | 0.00   | 0.20 | 2014/8/25 | 71.56   | 13.54 | 22.58 | 0.00   |
| 2014/8/20 | 21.57 | 3.11 | 20.81 | 0.00   | 0.30 | 2014/8/25 | -16.76  | 13.21 | 22.48 | 0.00   |
| 2014/8/20 | 7.71  | 3.44 | 20.85 | 0.00   | 0.30 | 2014/8/25 | -38.72  | 13.35 | 22.43 | 0.00   |
| 2014/8/20 | 17.28 | 3.63 | 20.95 | 1.20   | 0.10 | 2014/8/25 |         | 14.43 | 22.42 | 0.10   |
| 2014/8/20 | 33.39 | 4.28 | 21.07 | 14.16  | 0.00 | 2014/8/25 | -75.72  | 13.22 | 22.43 | 28.26  |
| 2014/8/20 | 17.26 | 4.15 | 21.21 | 54.09  | 0.00 | 2014/8/25 | -37.65  | 12.69 | 22.78 | 90.68  |
| 2014/8/20 | 33.28 | 3.90 | 21.54 | 164.36 | 0.00 | 2014/8/25 |         | 11.09 | 23.14 | 50.22  |
| 2014/8/20 | 34.64 | 4.03 | 22.14 | 224.04 | 0.00 | 2014/8/25 | -325.59 | 13.29 | 23.26 | 85.18  |

|           |        |      |       |        |      |            |         |       |       |        |
|-----------|--------|------|-------|--------|------|------------|---------|-------|-------|--------|
| 2014/8/20 | 32.90  | 4.02 | 22.62 | 322.01 | 0.00 | 2014/8/25  | -5.59   | 18.23 | 24.15 | 291.73 |
| 2014/8/20 | 46.80  | 3.92 | 23.39 | 384.63 | 0.00 | 2014/8/25  | -121.82 | 14.47 | 24.81 | 255.99 |
| 2014/8/20 | 58.42  | 3.83 | 24.35 | 381.83 | 0.00 | 2014/8/25  | -109.62 | 12.63 | 25.16 | 212.56 |
| 2014/8/20 | 53.81  | 3.63 | 25.05 | 242.62 | 0.05 | 2014/8/25  | -50.72  | 9.57  | 25.69 | 190.56 |
| 2014/8/20 | 29.86  | 3.49 | 24.01 | 215.03 | 0.10 | 2014/8/25  | 21.34   | 6.89  | 24.72 | 86.22  |
| 2014/8/20 | 14.77  | 3.51 | 25.36 | 359.80 | 0.00 | 2014/8/25  | -21.59  | 6.18  | 24.79 | 125.58 |
| 2014/8/20 | 10.97  | 3.42 | 25.81 | 151.08 | 0.00 | 2014/8/25  | -10.42  | 6.08  | 24.38 | 46.59  |
| 2014/8/20 | 6.93   | 3.37 | 25.39 | 55.72  | 0.00 | 2014/8/25  | 5.64    | 5.56  | 24.05 | 43.94  |
| 2014/8/20 | 10.21  | 3.24 | 24.52 | 4.43   | 0.00 | 2014/8/25  | -13.44  | 5.19  | 23.53 | 10.87  |
| 2014/8/20 | 1.83   | 3.24 | 23.79 | 0.00   | 0.00 | 2014/8/25  | 37.26   | 5.17  | 23.02 | 0.00   |
| 2014/8/20 | -7.49  | 3.46 | 23.61 | 0.00   | 0.00 | 2014/8/25  | 2.49    | 5.25  | 22.67 | 0.00   |
| 2014/8/20 | 3.27   | 3.54 | 23.36 | 0.00   | 0.00 | 2014/8/25  | 12.02   | 4.91  | 22.48 | 0.00   |
| 2014/8/20 | 5.50   | 3.49 | 23.17 | 0.00   | 0.00 | 2014/8/25  | 3.81    | 4.81  | 22.26 | 0.10   |
| 2014/11/7 | 6.07   | 3.76 | 13.89 | 0.00   | 0.00 | 2014/11/16 | 22.21   | 5.19  | 8.74  | 0.00   |
| 2014/11/7 | 1.78   | 3.73 | 13.56 | 0.00   | 0.00 | 2014/11/16 | -25.69  | 4.92  | 9.02  | 0.00   |
| 2014/11/7 | -0.94  | 4.09 | 13.58 | 0.00   | 0.00 | 2014/11/16 | -37.98  | 4.61  | 9.13  | 0.00   |
| 2014/11/7 | -4.74  | 4.44 | 13.63 | 0.00   | 0.00 | 2014/11/16 | -61.37  | 4.83  | 9.43  | 0.00   |
| 2014/11/7 | -2.75  | 4.91 | 13.36 | 0.00   | 0.00 | 2014/11/16 | -28.13  | 5.12  | 9.60  | 0.00   |
| 2014/11/7 | 1.69   | 4.97 | 13.35 | 0.00   | 0.00 | 2014/11/16 | -142.63 | 5.26  | 9.74  | 0.00   |
| 2014/11/7 | 0.88   | 4.90 | 13.30 | 0.06   | 0.00 | 2014/11/16 | 43.21   | 4.43  | 9.69  | 0.00   |
| 2014/11/7 | 9.98   | 4.72 | 13.26 | 13.29  | 0.10 | 2014/11/16 | 19.75   | 4.55  | 9.87  | 0.00   |
| 2014/11/7 | -12.76 | 5.49 | 13.64 | 75.57  | 0.00 | 2014/11/16 | 1.32    | 4.51  | 10.12 | 42.69  |
| 2014/11/7 | 3.75   | 5.54 | 14.57 | 109.40 | 0.00 | 2014/11/16 | 6.30    |       | 11.20 | 244.23 |
| 2014/11/7 | 5.93   | 5.59 | 14.83 | 141.91 | 0.15 | 2014/11/16 | -54.60  |       | 13.19 | 436.84 |
| 2014/11/7 | 23.13  | 5.38 | 14.82 | 117.14 | 0.25 | 2014/11/16 | 9.76    | 8.89  | 15.26 | 564.75 |
| 2014/11/7 | 13.99  | 5.15 | 14.66 | 62.97  | 0.45 | 2014/11/16 | 54.83   | 9.12  | 16.47 | 649.73 |
| 2014/11/7 | 6.89   | 4.97 | 14.42 | 35.48  | 0.25 | 2014/11/16 | 162.25  | 8.83  | 17.93 | 644.72 |
| 2014/11/7 | 10.76  | 5.15 | 14.27 | 11.79  | 0.15 | 2014/11/16 | 192.00  | 8.67  | 19.26 | 560.49 |
| 2014/11/7 | 10.65  | 5.32 | 14.29 | 9.77   | 0.50 | 2014/11/16 | 212.92  | 8.85  | 20.13 | 394.46 |
| 2014/11/7 | 23.92  | 5.39 | 14.19 | 6.19   | 0.50 | 2014/11/16 | 124.05  | 8.98  | 20.20 | 167.29 |
| 2014/11/7 | 18.84  | 4.97 | 13.83 | 1.97   | 0.60 | 2014/11/16 | 63.29   | 9.07  | 19.93 | 71.50  |
| 2014/11/7 | 17.74  | 5.05 | 13.63 | 0.01   | 0.60 | 2014/11/16 | 9.54    | 11.78 | 18.36 | 6.16   |
| 2014/11/7 | 11.69  | 4.91 | 13.39 | 0.00   | 1.45 | 2014/11/16 | -9.85   | 11.14 | 15.53 | 0.00   |
| 2014/11/7 | 19.59  | 4.39 | 13.13 | 0.00   | 1.10 | 2014/11/16 |         | 10.08 | 13.50 | 0.00   |

|           |       |      |       |        |      |            |         |       |       |        |
|-----------|-------|------|-------|--------|------|------------|---------|-------|-------|--------|
| 2014/11/7 | 21.20 | 4.19 | 12.88 | 0.00   | 0.90 | 2014/11/16 | -44.62  | 9.66  | 12.17 | 0.00   |
| 2014/11/7 | 13.81 | 4.28 | 12.95 | 0.00   | 0.85 | 2014/11/16 | -46.12  | 9.55  | 11.09 | 0.00   |
| 2014/11/7 | 17.01 | 4.35 | 12.98 | 0.00   | 0.50 | 2014/11/16 | -44.85  | 9.41  | 10.24 | 0.00   |
| 2014/11/8 | 16.08 | 4.52 | 13.00 | 0.00   | 0.50 | 2014/11/17 | -43.11  | 8.98  | 9.69  | 0.00   |
| 2014/11/8 | 18.71 | 4.62 | 12.94 | 0.00   | 0.50 | 2014/11/17 |         | 8.58  | 9.19  | 0.00   |
| 2014/11/8 | 18.64 | 4.41 | 12.86 | 0.00   | 0.60 | 2014/11/17 |         | 7.28  | 7.98  | 0.00   |
| 2014/11/8 | 17.65 | 4.33 | 12.79 | 0.00   | 0.55 | 2014/11/17 |         | 7.06  | 7.55  | 0.00   |
| 2014/11/8 | 18.85 | 4.30 | 12.78 | 0.00   | 0.60 | 2014/11/17 | -55.57  | 7.18  | 7.73  | 0.00   |
| 2014/11/8 | 17.50 | 4.22 | 12.77 | 0.00   | 0.10 | 2014/11/17 | 12.00   | 7.23  | 7.66  | 0.00   |
| 2014/11/8 | 17.06 | 4.15 | 12.86 | 0.01   | 0.00 | 2014/11/17 | -30.94  | 7.83  | 7.64  | 0.00   |
| 2014/11/8 | 13.37 | 4.17 | 12.93 | 9.73   | 0.00 | 2014/11/17 |         | 8.58  | 7.37  | 3.84   |
| 2014/11/8 | 10.60 | 4.34 | 13.35 | 75.40  | 0.00 | 2014/11/17 |         | 9.28  | 7.64  | 48.04  |
| 2014/11/8 | 3.62  | 4.48 | 13.71 | 138.09 | 0.00 | 2014/11/17 | -9.25   | 10.29 | 8.23  | 108.80 |
| 2014/11/8 | 16.11 | 4.11 | 14.13 | 192.99 | 0.00 | 2014/11/17 | -82.25  | 10.33 | 9.06  | 225.46 |
| 2014/11/8 | 11.26 | 3.86 | 14.74 | 187.26 | 0.00 | 2014/11/17 | -83.56  | 11.01 | 10.42 | 483.25 |
| 2014/11/8 | 13.32 | 4.44 | 15.05 | 56.98  | 0.00 | 2014/11/17 |         | 16.02 | 14.79 | 677.82 |
| 2014/11/8 | 19.48 | 4.56 | 14.92 | 79.58  | 0.00 | 2014/11/17 | 79.10   | 14.96 | 18.79 | 681.20 |
| 2014/11/8 | 13.81 | 4.25 | 15.13 | 89.87  | 0.00 | 2014/11/17 | 156.82  | 13.20 | 20.18 | 556.35 |
| 2014/11/8 | 22.26 | 3.99 | 15.16 | 75.52  | 0.00 | 2014/11/17 | 206.06  | 12.64 | 21.10 | 327.87 |
| 2014/11/8 | 15.84 | 3.60 | 15.02 | 25.55  | 0.00 | 2014/11/17 | 45.25   | 12.49 | 21.44 | 187.38 |
| 2014/11/8 | 12.81 | 3.31 | 14.51 | 8.87   | 0.00 | 2014/11/17 | -45.35  | 11.90 | 19.96 | 59.54  |
| 2014/11/8 | 12.92 | 3.12 | 13.89 | 0.20   | 0.00 | 2014/11/17 | -104.23 | 8.92  | 16.99 | 3.89   |
| 2014/11/8 | 8.04  | 3.07 | 13.70 | 0.00   | 0.00 | 2014/11/17 | 32.15   | 8.84  | 15.12 | 0.00   |
| 2014/11/8 | 8.62  | 2.94 | 13.63 | 0.00   | 0.00 | 2014/11/17 | 56.25   | 8.73  | 14.34 | 0.00   |
| 2014/11/8 | 5.63  | 2.98 | 13.55 | 0.00   | 0.00 | 2014/11/17 |         | 8.24  | 13.30 | 0.00   |
| 2014/11/8 | 7.23  | 3.00 | 13.53 | 0.00   | 0.00 | 2014/11/17 | -58.06  | 7.77  | 12.91 | 0.00   |
| 2014/11/8 | 6.48  | 2.96 | 13.32 | 0.00   | 0.00 | 2014/11/17 | 15.24   | 7.79  | 12.68 | 0.00   |
| 2014/11/9 | 10.90 | 3.02 | 12.92 | 0.00   | 0.00 | 2014/11/18 |         | 7.86  | 12.54 | 0.00   |
| 2014/11/9 | 11.65 | 2.92 | 11.72 | 0.00   | 0.00 | 2014/11/18 |         | 6.86  | 12.12 | 0.00   |
| 2014/11/9 | 14.03 | 2.62 | 11.01 | 0.00   | 0.00 | 2014/11/18 |         | 6.79  | 11.84 | 0.00   |
| 2014/11/9 | 10.56 | 2.54 | 10.37 | 0.00   | 0.00 | 2014/11/18 | -113.50 | 6.80  | 11.72 | 0.00   |
| 2014/11/9 | 13.07 | 2.42 | 9.82  | 0.00   | 0.00 | 2014/11/18 |         | 6.40  | 11.44 | 0.00   |
| 2014/11/9 | 0.51  | 2.37 | 9.34  | 0.00   | 0.00 | 2014/11/18 |         | 7.01  | 11.42 | 0.00   |
| 2014/11/9 | 0.62  | 2.41 | 8.98  | 0.22   | 0.00 | 2014/11/18 | 26.04   | 7.27  | 11.16 | 0.00   |

|            |        |      |       |        |      |            |         |       |       |        |
|------------|--------|------|-------|--------|------|------------|---------|-------|-------|--------|
| 2014/11/9  | 0.44   | 2.56 | 8.73  | 50.66  | 0.00 | 2014/11/18 | -89.69  | 7.23  | 10.84 | 5.50   |
| 2014/11/9  | -7.78  | 2.75 | 9.83  | 227.39 | 0.00 | 2014/11/18 |         | 5.83  | 10.60 | 42.74  |
| 2014/11/9  | 2.58   | 2.67 | 11.77 | 281.28 | 0.00 | 2014/11/18 |         | 7.06  | 11.93 | 139.73 |
| 2014/11/9  | 3.24   | 2.60 | 12.56 | 176.03 | 0.00 | 2014/11/18 | -25.75  | 8.44  | 13.46 | 223.24 |
| 2014/11/9  | 0.29   | 2.61 | 12.84 | 115.03 | 0.00 | 2014/11/18 |         | 10.96 | 15.20 | 286.62 |
| 2014/11/9  | -1.14  | 2.73 | 13.34 | 189.28 | 0.00 | 2014/11/18 | 48.80   | 11.86 | 16.05 | 265.11 |
| 2014/11/9  | 2.82   | 2.71 | 13.63 | 124.08 | 0.00 | 2014/11/18 | 48.85   | 11.89 | 16.97 | 321.79 |
| 2014/11/9  | -0.53  | 2.90 | 14.09 | 111.87 | 0.00 | 2014/11/18 | 46.48   | 11.70 | 17.23 | 261.45 |
| 2014/11/9  | 6.24   | 2.99 | 14.08 | 57.00  | 0.00 | 2014/11/18 | 46.22   | 11.68 | 17.84 | 259.28 |
| 2014/11/9  | 9.11   | 2.71 | 13.72 | 35.83  | 0.00 | 2014/11/18 | 41.50   | 11.52 | 17.05 | 96.63  |
| 2014/11/9  | 5.60   | 2.81 | 13.12 | 17.58  | 0.00 | 2014/11/18 | 21.03   | 11.30 | 16.73 | 36.38  |
| 2014/11/9  | 6.39   | 2.78 | 12.85 | 0.18   | 0.10 | 2014/11/18 |         | 10.99 | 15.86 | 0.00   |
| 2014/11/9  |        | 2.83 | 12.29 | 0.00   | 0.15 | 2014/11/18 |         | 10.60 | 14.78 | 0.00   |
| 2014/11/9  | 7.84   | 2.82 | 12.13 | 0.00   | 0.05 | 2014/11/18 | -2.48   | 9.80  | 14.05 | 0.00   |
| 2014/11/9  | 4.66   | 2.78 | 12.25 | 0.00   | 0.10 | 2014/11/18 |         | 9.45  | 13.41 | 0.00   |
| 2014/11/9  | 5.97   | 2.74 | 12.27 | 0.00   | 0.55 | 2014/11/18 | -2.10   | 8.94  | 12.95 | 0.00   |
| 2014/11/9  | 0.00   | 2.90 | 12.27 | 0.00   | 0.20 | 2014/11/18 | -13.97  | 8.94  | 12.81 | 0.00   |
| 2014/11/10 | 6.14   | 3.28 | 11.72 | 0.00   | 0.00 | 2014/11/19 |         | 8.67  | 12.60 | 0.00   |
| 2014/11/10 | 7.40   | 3.32 | 11.57 | 0.00   | 0.00 | 2014/11/19 | -66.40  | 8.76  | 12.39 | 0.00   |
| 2014/11/10 | 7.82   | 3.28 | 11.28 | 0.00   | 0.00 | 2014/11/19 |         | 8.49  | 12.16 | 0.00   |
| 2014/11/10 | 3.98   | 3.28 | 10.97 | 0.00   | 0.00 | 2014/11/19 | -110.66 | 8.08  | 11.90 | 0.00   |
| 2014/11/10 | 4.72   | 3.38 | 10.96 | 0.00   | 0.00 | 2014/11/19 | -175.40 | 7.61  | 11.52 | 0.00   |
| 2014/11/10 | 1.41   | 3.53 | 11.02 | 0.00   | 0.00 | 2014/11/19 | 13.11   | 7.00  | 11.22 | 0.00   |
| 2014/11/10 | 1.65   | 3.59 | 11.04 | 0.03   | 0.00 | 2014/11/19 |         | 6.69  | 10.40 | 0.00   |
| 2014/11/10 | 6.76   | 3.51 | 11.05 | 18.97  | 0.00 | 2014/11/19 |         | 6.47  | 9.47  | 6.71   |
| 2014/11/10 | -6.72  | 3.95 | 11.70 | 74.23  | 0.00 | 2014/11/19 | -26.35  | 6.73  | 9.24  | 49.86  |
| 2014/11/10 | -11.09 | 4.57 | 12.80 | 190.56 | 0.00 | 2014/11/19 |         | 7.41  | 9.74  | 160.42 |
| 2014/11/10 | 7.78   | 5.57 | 13.94 | 210.90 | 0.00 | 2014/11/19 | -115.17 | 7.89  | 11.83 | 397.80 |
| 2014/11/10 | 10.89  | 5.30 | 15.25 | 504.38 | 0.00 | 2014/11/19 | -59.99  | 8.50  | 15.31 | 521.46 |
| 2014/11/10 | 22.26  | 4.80 | 16.90 | 546.17 | 0.00 | 2014/11/19 | 34.36   | 8.67  | 17.24 | 608.38 |
| 2014/11/10 | 52.98  | 4.37 | 18.10 | 505.06 | 0.00 | 2014/11/19 | 90.92   | 6.95  | 18.51 | 611.71 |
| 2014/11/10 | 35.31  | 4.14 | 18.71 | 407.50 | 0.00 | 2014/11/19 | 89.74   | 6.68  | 19.30 | 543.36 |
| 2014/11/10 | 27.67  | 3.90 | 18.86 | 166.01 | 0.00 | 2014/11/19 | 102.85  | 6.41  | 19.88 | 423.25 |
| 2014/11/10 | 16.11  | 3.76 | 18.58 | 63.43  | 0.00 | 2014/11/19 | 76.54   | 6.07  | 20.22 | 200.86 |

|            |        |      |       |        |      |            |        |      |       |        |
|------------|--------|------|-------|--------|------|------------|--------|------|-------|--------|
| 2014/11/10 | 2.90   | 3.69 | 17.56 | 9.14   | 0.00 | 2014/11/19 | 32.32  | 5.93 | 19.75 | 55.15  |
| 2014/11/10 | 1.20   | 3.63 | 16.88 | 0.12   | 0.00 | 2014/11/19 | -21.44 | 5.63 | 16.86 | 5.10   |
| 2014/11/10 | 1.29   | 3.63 | 16.35 | 0.00   | 0.00 | 2014/11/19 | -28.81 | 5.13 | 14.45 | 0.00   |
| 2014/11/10 | -31.12 | 4.42 | 15.93 | 0.00   | 0.00 | 2014/11/19 | 2.73   | 4.86 | 12.76 | 0.00   |
| 2014/11/10 | -22.57 | 4.68 | 15.42 | 0.00   | 0.00 | 2014/11/19 | -0.61  | 4.80 | 11.85 | 0.00   |
| 2014/11/10 | -2.35  | 4.10 | 15.20 | 0.00   | 0.00 | 2014/11/19 | 3.03   | 4.62 | 10.68 | 0.00   |
| 2014/11/10 | 4.05   | 4.17 | 15.54 | 0.00   | 0.00 | 2014/11/19 | -24.58 | 4.51 | 10.12 | 0.00   |
| 2014/11/11 | 1.12   | 4.37 | 15.22 | 0.00   | 0.00 | 2014/11/20 | -68.49 | 4.47 | 9.45  | 0.00   |
| 2014/11/11 | 18.12  | 4.35 | 15.04 | 0.00   | 0.00 | 2014/11/20 | -21.75 | 4.35 | 8.97  | 0.00   |
| 2014/11/11 |        | 4.35 | 14.47 | 0.00   | 0.00 | 2014/11/20 | -18.50 | 4.32 | 8.43  | 0.00   |
| 2014/11/11 | 0.63   | 4.46 | 14.31 | 0.00   | 0.00 | 2014/11/20 | 5.31   | 3.98 | 8.25  | 0.00   |
| 2014/11/11 | 0.08   | 4.60 | 14.12 | 0.00   | 0.00 | 2014/11/20 | -20.27 | 3.51 | 7.77  | 0.00   |
| 2014/11/11 | 1.29   | 4.36 | 14.16 | 0.00   | 0.00 | 2014/11/20 | 12.39  | 3.50 | 7.93  | 0.00   |
| 2014/11/11 | 0.77   | 4.46 | 13.95 | 0.02   | 0.00 | 2014/11/20 | 15.05  | 3.17 | 7.95  | 0.00   |
| 2014/11/11 | 3.87   | 4.57 | 13.94 | 7.10   | 0.00 | 2014/11/20 | -22.94 | 3.36 | 8.25  | 1.87   |
| 2014/11/11 | -4.60  | 4.89 | 14.38 | 50.09  | 0.00 | 2014/11/20 | 56.49  | 3.32 | 8.64  | 36.33  |
| 2014/11/11 | 6.64   | 4.94 | 15.13 | 107.34 | 0.00 | 2014/11/20 | 42.84  | 3.57 | 9.54  | 103.05 |
| 2014/11/11 | 3.69   | 5.25 | 16.24 | 280.47 | 0.00 | 2014/11/20 | 72.51  | 3.80 | 10.57 | 148.11 |
| 2014/11/11 | 19.49  | 4.66 | 18.38 | 514.67 | 0.00 | 2014/11/20 | 1.32   | 4.10 | 11.64 | 137.41 |
| 2014/11/11 | 45.52  | 3.98 | 19.69 | 511.67 | 0.00 | 2014/11/20 | 44.56  | 4.56 | 12.57 | 167.38 |
| 2014/11/11 | 60.76  | 3.94 | 20.38 | 410.45 | 0.00 | 2014/11/20 | 14.41  | 5.30 | 13.56 | 224.80 |
| 2014/11/11 | 34.72  | 4.03 | 20.12 | 228.61 | 0.00 | 2014/11/20 | 40.13  | 6.05 | 14.80 | 280.47 |
| 2014/11/11 | 30.45  | 3.74 | 19.75 | 87.02  | 0.00 | 2014/11/20 | 41.71  | 5.84 | 15.21 | 158.81 |
| 2014/11/11 | 8.78   | 4.25 | 19.23 | 58.44  | 0.00 | 2014/11/20 | 32.56  | 5.49 | 14.72 | 36.33  |
| 2014/11/11 |        | 7.93 | 18.65 | 16.47  | 0.00 | 2014/11/20 | 25.40  | 5.28 | 14.67 | 41.42  |
| 2014/11/11 | 14.58  | 5.89 | 17.86 | 0.16   | 0.00 | 2014/11/20 | -32.07 | 4.89 | 14.27 | 0.00   |
| 2014/11/11 | 29.84  | 5.60 | 17.28 | 0.00   | 0.00 | 2014/11/20 | -12.34 | 4.66 | 14.02 | 0.00   |
| 2014/11/11 | 2.21   | 8.48 | 16.34 | 0.00   | 0.00 | 2014/11/20 |        | 4.86 | 13.77 | 0.00   |
| 2014/11/11 | -12.26 | 6.81 | 15.64 | 0.00   | 0.00 | 2014/11/20 | -6.57  | 4.69 | 13.57 | 0.00   |
| 2014/11/11 | 19.48  | 6.97 | 15.22 | 0.00   | 0.00 | 2014/11/20 |        | 4.67 | 13.34 | 0.00   |
| 2014/11/11 | 8.53   | 7.89 | 14.74 | 0.00   | 0.00 | 2014/11/20 |        | 4.69 | 13.18 | 0.00   |

---
